# Supplementary material for: Protocol for project recovery after cardiac surgery: a single-center cohort study leveraging digital platform to characterise longitudinal patient-reported postoperative recovery patterns
Source: PubMed Central journal article supplement — BMJ Open. 2020 Sep 1;10(9):e036959. doi: 10.1136/bmjopen-2020-036959 (PMC7467526; doi:10.1136/bmjopen-2020-036959), 2020-09-01
Supplement: bmjopen-2020-036959.draft_revisions.pdf [file bmjopen-2020-036959.draft_revisions.pdf]

# BMJ Open

BMJ Open is committed to open peer review. As part of this commitment we make the peer review history of every article we publish publicly available.

When an article is published we post the peer reviewers' comments and the authors' responses online. We also post the versions of the paper that were used during peer review. These are the versions that the peer review comments apply to.

The versions of the paper that follow are the versions that were submitted during the peer review process. They are not the versions of record or the final published versions. They should not be cited or distributed as the published version of this manuscript.

BMJ Open is an open access journal and the full, final, typeset and author-corrected version of record of the manuscript is available on our site with no access controls, subscription charges or pay-per-view fees (<http://bmjopen.bmj.com>).

If you have any questions on BMJ Open's open peer review process please email [info.bmjopen@bmj.com](mailto:info.bmjopen@bmj.com)

# BMJ Open

## Protocol for Project Recovery: Cardiac Surgery - Leveraging Digital Platform for Efficient Collection of Longitudinal Patient-Reported Outcome Data Towards Improving Postoperative Recovery

|                               |                                                                                                                                                                                                                                                                                                                                                                                                                                                                                                                                                                                                                                                                                                  |
|-------------------------------|--------------------------------------------------------------------------------------------------------------------------------------------------------------------------------------------------------------------------------------------------------------------------------------------------------------------------------------------------------------------------------------------------------------------------------------------------------------------------------------------------------------------------------------------------------------------------------------------------------------------------------------------------------------------------------------------------|
| Journal:                      | <i>BMJ Open</i>                                                                                                                                                                                                                                                                                                                                                                                                                                                                                                                                                                                                                                                                                  |
| Manuscript ID                 | bmjopen-2020-036959                                                                                                                                                                                                                                                                                                                                                                                                                                                                                                                                                                                                                                                                              |
| Article Type:                 | Protocol                                                                                                                                                                                                                                                                                                                                                                                                                                                                                                                                                                                                                                                                                         |
| Date Submitted by the Author: | 13-Jan-2020                                                                                                                                                                                                                                                                                                                                                                                                                                                                                                                                                                                                                                                                                      |
| Complete List of Authors:     | Mori, Makoto; Yale School of Medicine, Cardiac Surgery<br>Brooks, Cornell; Yale School of Medicine, Cardiac Surgery<br>Spatz, Erica; Yale University, Section of Cardiovascular Medicine; Yale University School of Medicine, Center for Outcomes Research and Evaluation<br>Mortazavi, Bobak; Texas A&M University System, Computer Science and Engineering<br>Dhruva, Sanket; University of California San Francisco<br>Linderman, George; Yale School of Medicine<br>Grab, Lawrence; Yale School of Medicine<br>Zhang, Yawei; School of Public Health,<br>Geirsson, Arnar; Yale School of Medicine<br>Chaudhry, Sarwat; Yale School of Medicine<br>Krumholz, Harlan; Yale School of Medicine, |
| Keywords:                     | Cardiac surgery < SURGERY, Quality in health care < HEALTH SERVICES ADMINISTRATION & MANAGEMENT, Telemedicine < BIOTECHNOLOGY & BIOINFORMATICS                                                                                                                                                                                                                                                                                                                                                                                                                                                                                                                                                   |
|                               |                                                                                                                                                                                                                                                                                                                                                                                                                                                                                                                                                                                                                                                                                                  |

SCHOLARONE™  
Manuscripts

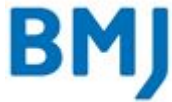

I, the Submitting Author has the right to grant and does grant on behalf of all authors of the Work (as defined in the below author licence), an exclusive licence and/or a non-exclusive licence for contributions from authors who are: i) UK Crown employees; ii) where BMJ has agreed a CC-BY licence shall apply, and/or iii) in accordance with the terms applicable for US Federal Government officers or employees acting as part of their official duties; on a worldwide, perpetual, irrevocable, royalty-free basis to BMJ Publishing Group Ltd ("BMJ") its licensees and where the relevant Journal is co-owned by BMJ to the co-owners of the Journal, to publish the Work in this journal and any other BMJ products and to exploit all rights, as set out in our [licence](#).

The Submitting Author accepts and understands that any supply made under these terms is made by BMJ to the Submitting Author unless you are acting as an employee on behalf of your employer or a postgraduate student of an affiliated institution which is paying any applicable article publishing charge ("APC") for Open Access articles. Where the Submitting Author wishes to make the Work available on an Open Access basis (and intends to pay the relevant APC), the terms of reuse of such Open Access shall be governed by a Creative Commons licence – details of these licences and which [Creative Commons](#) licence will apply to this Work are set out in our licence referred to above.

Other than as permitted in any relevant BMJ Author's Self Archiving Policies, I confirm this Work has not been accepted for publication elsewhere, is not being considered for publication elsewhere and does not duplicate material already published. I confirm all authors consent to publication of this Work and authorise the granting of this licence.

1 **Title:** Protocol for Project Recovery: Cardiac Surgery - Leveraging Digital  
2 Platform for Efficient Collection of Longitudinal Patient-Reported Outcome Data  
3 Towards Improving Postoperative Recovery  
4  
5  
6  
7  
8  
9

10 **Authors:** Makoto Mori MD<sup>1, 2</sup>, Cornell Brooks II BA<sup>1</sup>, Erica Spatz MD MHS<sup>2, 3</sup>,  
11 Bobak J Mortazavi PhD<sup>4</sup>, Sanket S. Dhruva MD MHS<sup>5,6</sup>, George C. Linderman  
12 PhD<sup>1</sup>, Lawrence A. Grab MBA<sup>1</sup>, Yawei Zhang PhD MD<sup>7</sup>, Arnar Geirsson MD<sup>1</sup>,  
13 Sarwat I. Chaudhry MD<sup>8</sup>, Harlan M. Krumholz MD SM<sup>9</sup>  
14  
15  
16  
17  
18  
19  
20  
21  
22  
23

24 **Key word:** Cardiac surgery, postoperative recovery, patient-centered outcome,  
25 longitudinal, latent class  
26  
27

28 **Affiliations:**

29 <sup>1</sup>Section of Cardiac Surgery, Yale School of Medicine, New Haven, Connecticut  
30  
31

32 <sup>2</sup>Center for Outcomes Research and Evaluation, Yale-New Haven Hospital, New  
33 Haven, Connecticut  
34  
35

36 <sup>3</sup>Section of Cardiovascular Medicine, Department of Internal Medicine, Yale  
37 School of Medicine, New Haven, Connecticut  
38  
39

40 <sup>4</sup>Department of Computer Science and Engineering, Texas A&M University,  
41 College Station, Texas  
42  
43

44 <sup>5</sup>Department of Medicine, University of California San Francisco School of  
45 Medicine, San Francisco, California  
46  
47

48 <sup>6</sup>San Francisco VA Medical Center, San Francisco, California  
49  
50  
51  
52  
53  
54  
55  
56  
57  
58  
59  
60

1  
2  
3 23 <sup>7</sup>Department of Environmental Health Sciences, Yale School of Public Health,  
4

5 24 Department of Surgery, Yale School of Medicine, New Haven, Connecticut  
6

7 25 <sup>8</sup>Section of General Internal Medicine, Department of Medicine, Yale School of  
8

9 26 Medicine, New Haven, Connecticut  
10

11 27 <sup>9</sup>Section of Cardiovascular Medicine, Department of Internal Medicine, Yale  
12

13 28 School of Medicine and the Department of Health Policy and Management, Yale  
14

15 29 School of Public Health, New Haven, Connecticut  
16

17 30  
18

19 31 **Corresponding author:**  
20

21 32 Harlan M. Krumholz, MD SM  
22

23 33 Center for Outcomes Research and Evaluation (CORE)  
24

25 34 1 Church Street, Suite 200, New Haven, Connecticut 06510  
26

27 35 Telephone: 203-764-5885; Fax: 203-764-5653  
28

29 36 Email: harlan.krumholz@yale.edu  
30

31 37  
32

33 38  
34  
35  
36  
37  
38  
39  
40  
41  
42  
43  
44  
45  
46  
47  
48  
49  
50  
51  
52  
53  
54  
55  
56  
57  
58  
59  
60

1  
2  
3 39  
4 40 **Abstract** (287/300)  
5

6  
7 41 Introduction  
8  
9

10 42 Improving postoperative patient recovery after cardiac surgery is a priority,  
11  
12 43 but our current understanding of individual variations in recovery and factors  
13  
14 44 associated with poor recovery is limited. We are using a health-information  
15  
16 45 exchange platform to collect patient-reported outcome measures (PROMs) and  
17  
18 46 wearable device data to phenotype recovery patterns in the 30-day period after  
19  
20 47 cardiac surgery hospital discharge, to identify factors associated with these  
21  
22 48 phenotypes and to investigate phenotype associations with clinical outcomes.  
23  
24  
25

26 49

27  
28  
29 50 Methods and analysis  
30  
31

32 51 We designed a prospective cohort study to enroll 200 patients undergoing  
33  
34 52 valve, coronary artery bypass graft, or aortic surgery at a tertiary center in the  
35  
36 53 U.S. We are enrolling patients postoperatively after the intensive care unit (ICU)  
37  
38 54 discharge, and delivering electronic surveys directly to patients every 3 days for  
39  
40 55 30 days after hospital discharge. We will conduct medical record reviews to  
41  
42 56 collect patient demographics, comorbidity, operative details and hospital course  
43  
44 57 using the Society of Thoracic Surgeons (STS) data definitions. We will use phone  
45  
46 58 interview and medical record review data for adjudication of survival,  
47  
48 59 readmission, and complications. We will apply group-based trajectory modeling  
49  
50 60 to the time-series PROM and device data to classify patients into distinct  
51  
52 61 categories of recovery trajectories. We will evaluate whether certain recovery  
53  
54  
55  
56  
57  
58  
59  
60

62 pattern predicts death or hospital readmissions, as well as whether clinical  
63 factors predict a patient having poor recovery trajectories. We will evaluate  
64 whether early recovery patterns predict the overall trajectory at the patient-level.

65

## 66 Ethics and dissemination

67 The Yale Institutional Review Board approved this study. Following the  
68 description of the study procedure, we obtain written informed consent from all  
69 study participants. The consent form states that all personal information, survey  
70 response, and any medical records are confidential, will not be shared, and are  
71 stored in an encrypted database.

72

## 73 **Strengths and limitations of this study**

- 74 • This study will assess the patient perspective on recovery after cardiac  
75 surgery at a high frequency within the 30-day postoperative period with  
76 surveys and activity monitoring via a health information platform and  
77 wearable devices.
- 78 • Using longitudinal patient-reported outcomes measure (PROM) data, this  
79 study will define recovery patterns and factors associated with different  
80 recovery trajectories and guide the development interventions to improve  
81 recovery and support expansion of the study to additional sites.
- 82 • The study is single center and the sample size is limited.

1  
2  
3 83 Text (4081 words)  
4

5 84 **Background**  
6

7  
8 85 Improving postoperative patient recovery is a priority. Readmission rates  
9  
10 86 in the post-operative period are high. Moreover, in the United States, the  
11  
12 87 expansion of episode-based payments and performance measures is increasing  
13  
14 88 interest in the post-acute experience of patients<sup>1,2</sup>. However, we generally lack  
15  
16 89 systematically-collected information on the experience of patients in the post-  
17  
18 90 acute period, as few studies rigorously collecting information using established  
19  
20 91 patient-reported outcomes measures (PROMs). We have, for example, little  
21  
22 92 information about the variation of the trajectories of recovery and the factors most  
23  
24 93 strongly associated with better outcomes<sup>3</sup>.  
25  
26  
27

28 94 The assessment of the patient experience can provide important insights  
29  
30 95 into the process of recovery that is not evident through clinical outcomes or  
31  
32 96 intermittent clinical office visits. PROMs and wearable devices can provide  
33  
34 97 complementary information by providing measurements of how the patient's  
35  
36 98 experience and functional status change over time<sup>4</sup>. Current digital platforms  
37  
38 99 allow us to efficiently collect PROMs and wearable-generated data at high  
39  
40 100 frequencies and with little cost and burden. These automated data collection  
41  
42 101 approaches may minimize the bias introduced by clinician-directed patient  
43  
44 102 interviews<sup>5</sup>. Such a platform is highly suited to obtain repeated measures to  
45  
46 103 characterize a time-dependent process such as recovery<sup>6</sup>.  
47  
48  
49  
50

51 104 Cardiac surgery is an ideal area for the study of recovery. Many patients  
52  
53 105 have good outcomes, but the limited existing evidence suggests a wide variation  
54  
55  
56  
57  
58  
59  
60



1  
2  
3 106 in the post-operative experience of these patients<sup>7</sup>. However, these patients'  
4  
5 107 experience has been poorly studied, as most studies of recovery simply assess  
6  
7 108 deaths and complications.  
8  
9

10 109 Characterizing the recovery from the patient perspective is important for  
11  
12 110 many reasons. First, shared decision-making and informed consent should be  
13  
14 111 guided not only by the risk of mortality and complications but also by the recovery  
15  
16 112 experience. Understanding variations in recovery could enable the early  
17  
18 113 identification of people who are struggling and require additional attention.  
19  
20 114 Recovery data from the patient perspective may enable remote monitoring after  
21  
22 115 the procedure to selectively and preemptively intervene on those at high risk of  
23  
24 116 poor recovery to improve outcomes. Characterization of recovery can also be  
25  
26 117 used to identify patient, surgeon, procedural, and institutional factors that are  
27  
28 118 associated with different patterns. With this information we can identify modifiable  
29  
30 119 risk factors for poor recovery.  
31  
32  
33  
34

35 120 Thus, at this juncture, there are several notable gaps in knowledge. First,  
36  
37 121 although recovery occurs over time, most studies of recovery included a small  
38  
39 122 number of timepoints, and the recovery trajectory phenotypes remains poorly  
40  
41 123 defined<sup>3</sup>. Cohort-level average of recovery trajectories is a common way of  
42  
43 124 reporting<sup>3</sup> and can indicate how patients recover on average<sup>7</sup>, but it obscures  
44  
45 125 individual variation such as rapid early recovery, gradual recovery, or initial  
46  
47 126 recovery followed by a decline. Second, we have limited understanding of how  
48  
49 127 recovery trajectories vary by patient factors, operation types, center or surgeon  
50  
51  
52  
53  
54  
55  
56  
57  
58  
59  
60

1  
2  
3 128 characteristics, procedural processes, and complications, which limit  
4  
5 129 opportunities to identify high risk patients preemptively and intervene.  
6

7  
8 130 Accordingly, our overall objective is to characterize short-term trajectories  
9  
10 131 of patient recovery after cardiac surgery using PROMs and wearable data. We  
11  
12 132 are conducting a prospective study to characterize trajectories of postoperative  
13  
14 133 recovery in multiple domains after cardiac surgery. The specific aims of this study  
15  
16 134 are to: 1) leverage a digital data platform to collect PROM and wearable device  
17  
18 135 data to bring forth the variable individual recovery trajectories, 2) describe distinct  
19  
20 136 classes of recovery trajectories and clinical factors associated with the classes,  
21  
22 137 and 3) to evaluate whether early postoperative recovery trajectory predicts later  
23  
24 138 recovery trajectory. In addition, we will investigate optimal ways to manage  
25  
26 139 missing data specific to these time-series data This study is a step toward using  
27  
28 140 this approach to prospectively monitor and preemptively identify patients at risk of  
29  
30 141 poor recovery and facilitate intervention to reduce the risk of adverse events.  
31  
32  
33  
34

35 142

## 36 37 143 **Methods**

### 38 144 *Design Overview*

39  
40  
41 145 This is a prospective cohort study of patients who are undergoing valve,  
42  
43 146 CABG, or aortic surgery at a tertiary center in the U.S. We chose the operations  
44  
45 147 because they are the most common cardiac operations performed<sup>8</sup>. We are  
46  
47 148 enrolling patients postoperatively after ICU discharge in order to ensure clinical  
48  
49 149 stability, and we electronically delivering surveys directly to patients every 3 days  
50  
51  
52 150 for 30 days after hospital discharge to study patient trajectories in multiple  
53  
54  
55  
56  
57  
58  
59  
60

1  
2  
3 151 domains characterizing recovery. The closing phone interview after 30 days,  
4  
5 152 electronic medical record review, and linkage to the Society of Thoracic  
6  
7 153 Surgeons database are used to confirm survival, readmission, and complications.  
8  
9  
10 154 The closing interview asks about details of readmissions if they occurred,  
11  
12 155 patients' overall satisfaction with the study, and whether their experience was  
13  
14 156 well captured by the summary of their PROM data. We will apply group-based  
15  
16 157 trajectory modeling to the longitudinal PROM data to identify distinct categories of  
17  
18 158 recovery trajectories in a data-driven fashion. We also identify predictors of  
19  
20 159 protracted recovery trajectory and evaluate whether early recovery patterns (<10  
21  
22 160 days) predict the overall trajectory (30 days) at the patient-level. The Yale  
23  
24 161 Institutional Review Board approved this study.  
25  
26  
27  
28  
29

### 30 31 163 *Patient Population*

32  
33 164 This study began in January 2019 and is ongoing. The study is taking  
34  
35 165 place at Yale-New Haven Hospital, a tertiary center in the United States, where  
36  
37 166 over 1,100 cardiac surgeries are performed annually. Inclusion criteria are  
38  
39 167 patients of age 18 and older who are undergoing coronary artery bypass grafting  
40  
41 168 (CABG), valve replacement or repair, or aortic operations. Exclusion criteria are  
42  
43 169 those who undergo heart transplant, extracorporeal membrane oxygenation  
44  
45 170 (ECMO), adult congenital operations, or ventricular assist device implantation, as  
46  
47 171 these patient populations tend to have a longer course of intensive care unit  
48  
49 172 stay<sup>9</sup>, precluding the timely enrollment necessary to capture immediate  
50  
51 173 postoperative recovery. We also excluded those who do not own a smartphone  
52  
53  
54  
55  
56  
57  
58  
59  
60

1  
2  
3 174 or a tablet or those who do not speak or read English, because the digital  
4  
5 175 platform for PROM data collection relies on patients responding to surveys  
6  
7 176 displayed on web browser via email or text, and the surveys were written in  
8  
9  
10 177 English language. We do not allow proxy for survey response and consequently  
11  
12 178 excluded patients who were not able to respond by themselves as determined by  
13  
14  
15 179 the research assistant.

16  
17 180

### 181 *Recruitment*

182 Recruitment takes place postoperatively after the patient has left the  
183 intensive care unit (ICU) for the step-down or floor unit (Figure 1). We chose to  
184 enroll patients postoperatively, as opposed to preoperatively, because  
185 postoperative enrollment allows for enrollment of patients who undergo surgery  
186 under non-elective settings. Recruitment after transfer from the ICU setting  
187 ensures clinical stability. A research assistant (RA) visits the patient and after  
188 confirming the patient is eligible to participate and following the description of the  
189 study procedure, obtains written informed consent (Supplementary Material S1)  
190 from all study participants. The informed consent form states that all personal  
191 information, survey response, and any medical records are confidential, will not  
192 be shared, and will be stored in an encrypted database.

193 We iteratively refined the enrollment process to minimize the onboarding  
194 time, which includes obtaining informed consent and signup process directed by  
195 the RA on a tablet device to enter patient name and email address or phone  
196 number and takes approximately 10-15 minutes.

1  
2  
3 1974  
5 198 *PROM instrument and administration*

6  
7  
8 199 We use 24-item quality of recovery (QoR-24) to characterize patients'  
9  
10 200 postoperative recovery in various domains. The questionnaire consists of 24  
11  
12 201 items that were developed and validated in inpatient and outpatient surgical  
13  
14 202 populations<sup>10-13</sup>. The instrument was previously adapted into a mobile format and  
15  
16 203 was successfully used to administer the survey daily for 14 days<sup>11, 12</sup>. We added 3  
17  
18 204 items to QoR-24 to capture the self-reported time patients went to sleep, the time  
19  
20 205 they awakened, and their global perception of how much they have 'recovered' in  
21  
22 206 a 0-100% scale. The resulting 27-item questionnaire takes 2-4 minutes to  
23  
24 207 complete, making its frequent administration feasible (Supplementary Material  
25  
26 208 S2). Among the published studies in cardiac surgery, this study will have the  
27  
28 209 highest number of PROM data points collected in the first postoperative month<sup>3</sup>.

29  
30  
31  
32  
33 21034  
35 211 *Digital data platform*

36  
37 212 We are delivering surveys on the day of enrollment and every 3 days for  
38  
39 213 30 days. This method provides detailed longitudinal data across multiple domains  
40  
41 214 of recovery (Figure 2). To facilitate data organization and scheduled survey  
42  
43 215 delivery, we use Hugo (Me2Health, LLC, Guilford CT, USA) a patient-centered  
44  
45 216 health data sharing platform, which has a customizable survey delivery function  
46  
47 217 and reminder feature to facilitate data collection. Hugo platform allows for  
48  
49 218 automated delivery of surveys without researchers having to directly contact  
50  
51 219 patients, which facilitates high-frequency data collection. Additionally, it imports  
52  
53  
54  
55  
56  
57  
58  
59  
60

1  
2  
3 220 data from connected wearable devices to facilitate centralization of patient health  
4  
5 221 data. The patients retain access to their own data in a cloud-based account.  
6  
7

8 222

9  
10 223 *Identifying common reasons for low response rate*

11  
12 224 Recognizing that the survey response will be incomplete for some  
13  
14 225 participants, we have conducted a phone interview with the first 22 patients to  
15  
16 226 learn reasons for low responses and identify strategies to minimize the barriers  
17  
18 227 toward survey response for subsequent participants. In the first 22 patients, we  
19  
20 228 identified 5 with response rate of <50% and conducted recorded phone  
21  
22 229 interviews. Our interview guide (Supplementary Material S3) contained questions  
23  
24 230 to elucidate technical barriers, differential preferences for engagement, and or  
25  
26 231 any other issues precluding survey completion. We also asked whether the  
27  
28 232 length of the questionnaire or types of questions asked made it difficult to  
29  
30 233 complete the survey. Two members of the research team (CB and MM)  
31  
32 234 evaluated the interview recordings to identify common reasons for low response  
33  
34 235 rate. This suggested the potential importance of reminder to maintain patient  
35  
36 236 engagement. We modified the protocol to contact all participants approximately  
37  
38 237 10 days after enrollment.  
39  
40  
41  
42  
43

44 238

45 239

46  
47  
48  
49 240 *Additional clinical data and adjudication of hospitalization and survival*

50  
51 241 Additionally, we are using the Society of Thoracic Surgeons (STS) Adult  
52  
53 242 Cardiac Surgery Database data specifications to retrospectively collect clinically  
54  
55  
56  
57  
58  
59  
60

1  
2  
3 243 relevant data in this patient population. Pre-specified candidate predictors in this  
4  
5 244 database will be used to identify clinical predictors of recovery trajectories (Table  
6  
7 245 1). The STS database contains patient demographics, comorbidities, presenting  
8  
9  
10 246 clinical status, operative details, and postoperative mortality and morbidity up to  
11  
12 247 30 days after the time of operation<sup>14</sup>. These data are routinely collected at Yale  
13  
14  
15 248 New Haven Hospital.

16  
17 249 We will determine mortality and hospital readmissions by several  
18  
19 250 approaches: review of hospital records, review of cardiac surgery clinic notes,  
20  
21 251 and conducting closing phone interviews with the patient or contact person  
22  
23  
24 252 previously identified.

25  
26 253

#### 27 28 254 *Patient Involvement*

29  
30  
31 255 Prior to launching the study, we interviewed 5 patients both in pre and  
32  
33 256 postoperative settings to evaluate whether the frequency of survey delivery and  
34  
35 257 PROM instrument were likely to adequately capture their experience of recovery.  
36  
37  
38 258 All patients agreed that the frequency of questionnaire administration and the  
39  
40 259 length of the PROM instrument were reasonable and provided face validity that  
41  
42 260 the questionnaire captured aspects of recovery that were important to the  
43  
44  
45 261 patients. Additionally, this article is authored with a patient (LG) who participated  
46  
47 262 in the study to reflect his perspective on the study design and experience in  
48  
49 263 responding to the surveys.

50  
51 264

#### 52 53 265 *Sample size*

1  
2  
3 266 The study sample target is 200 patients. Adequate sample size for studies  
4  
5 267 using group-based trajectory modeling depends on the dataset's  
6  
7 268 representativeness of the population of interest<sup>15</sup>. Therefore, the concept of  
8  
9 269 statistical power traditionally used for sample size calculation does not apply to  
10  
11 270 latent class analyses. We may generate a larger simulation dataset from the  
12  
13 271 measured patient trajectory data to perform a split-sample testing, evaluating  
14  
15 272 whether trajectories generated from the derivation sample would allow for  
16  
17 273 satisfactory categorization of the testing dataset. Additionally, the study setting is  
18  
19 274 scalable to increase the sample size by increasing the enrollment period, should  
20  
21 275 a larger sample size become necessary.  
22  
23  
24  
25

26 276

27 277 *Analytical approach – group-based trajectory modeling*

28  
29  
30 278 The resulting dataset is a complex time-series data, with each patient having 10  
31  
32 279 data points (one every three days) at different postoperative times for each item. A  
33  
34 280 practical approach to dimension reduction is group-based trajectory modeling, which is a  
35  
36 281 type of latent class analysis that groups similar patient trajectories according to a number  
37  
38 282 of features derived from the time-series data<sup>16, 17</sup>. This approach allows for dimension  
39  
40 283 reduction of the complex time-series data into several distinct classes of recovery  
41  
42 284 trajectories. These trajectories can be labeled according to the observed clinical  
43  
44 285 phenotype of trajectories, for example 'fast recovery,' 'average recovery,' or 'protracted  
45  
46 286 recovery,'. This data-driven categorization enables additional regression modeling to  
47  
48 287 identify predictors of patients belonging to a certain class of recovery path.  
49  
50  
51  
52  
53  
54  
55  
56  
57  
58  
59  
60



1  
2  
3 288 The dataset will be classified into distinct categories of trajectories at domain  
4  
5 289 level, using group-based trajectory modeling<sup>16, 17</sup>. Traj package on R<sup>18</sup> or Proc Traj  
6  
7 290 package on SAS<sup>15</sup>, performs trajectory modeling by first extracting 24 features of patient-  
8  
9 291 level trajectory, selecting a subset of features that describes the overall trajectory, and  
10  
11 292 identifying optimal number of classes to group the trajectories based on the longitudinal  
12  
13 293 k-means method. The 24 features include range, mean change per unit time, and slope of  
14  
15 294 the linear model (Table 2), which have been demonstrated to discriminate between stable-  
16  
17 295 unstable, increasing-decreasing, linear-nonlinear, and monotonic-nonmonotonic patterns  
18  
19 296 of trajectories<sup>18</sup>. K-means method partitions the time-series data into k groups such that  
20  
21 297 the mean squared error distance of each data point from the assigned cluster is  
22  
23 298 minimized<sup>19</sup>. The optimal number of clusters is determined by the minimization of  
24  
25 299 Bayesian information criterion, which signifies the balance between model's complexity  
26  
27 300 and the ability to describe the dataset. This process yields distinct classes of patient  
28  
29 301 trajectories in a data-driven fashion. Trajectories will be identified separately for the 5  
30  
31 302 domains and 1 global recovery measure.  
32  
33  
34  
35  
36  
37  
38  
39

#### 40 304 *Analytical approach – missing data*

41  
42 305 Because missing data are inevitable in longitudinal PROMs, there is a  
43  
44 306 need employ an appropriate handling of missing data. Multiple imputation prior to  
45  
46 307 latent class analysis may yield a less biased estimate of the resulting trajectories.  
47  
48 308 An alternative approach used in group-based trajectory models assumes the data  
49  
50 309 are missing at random (MAR) and generates the maximum likelihood of the  
51  
52 310 model parameters<sup>20</sup>. MAR is valid when the response attrition is independent of  
53  
54  
55  
56  
57  
58  
59  
60

1  
2  
3 311 the group membership. However, patient attrition is oftentimes dependent on  
4  
5 312 clinical characteristics and likely related to the class of trajectory itself. An  
6  
7 313 extension of the model allows for modeling of attrition across trajectory groups<sup>21</sup>,  
8  
9 314 permitting dropout probability to vary as a function of covariates or observed  
10  
11 315 outcomes prior to dropout and yields a more robust estimate of the probability of  
12  
13 316 group membership. As such, we will perform sensitivity analysis to compare the  
14  
15 317 trajectories generated via raw data vs. data preprocessed with multiple  
16  
17 318 imputation vs. trajectories generated via trajectory model accounting for response  
18  
19 319 attrition.  
20  
21  
22  
23  
24  
25

## 26 321 **Results**

27  
28 322 Between January and May 2019, we have enrolled 22 patients who  
29  
30 323 completed the 30-day follow-up. In this cohort, median age was 58.5 years  
31  
32 324 (interquartile range 53.5-67.0) and 7 (32%) were women. There were 9 (41%)  
33  
34 325 mitral valve repair cases and 6 isolated or concomitant CABG (27%).  
35  
36  
37  
38  
39

### 40 327 *Barriers to completing surveys*

41  
42 328 Of the 22 patients enrolled, 3 (14%) did not complete any surveys, 19  
43  
44 329 (86%) completed at least 3 surveys, and 17 patients (77%) completed at least 6  
45  
46 330 of 11 delivered surveys (>50% of delivered surveys). Of the 5 patients who  
47  
48 331 completed less than half of the surveys, we successfully contacted 4, and 1 could  
49  
50 332 not be reached after 5 attempts. All 4 reported that the major barriers precluding  
51  
52 333 survey completion were their clinical conditions: 2 described readmissions as an  
53  
54  
55  
56  
57  
58  
59  
60

1  
2  
3 334 overwhelming event that made them feel continuing survey participation  
4  
5 335 challenging, and 2 described not feeling well in general, which precluded  
6  
7 336 participation. All 4 patients noted that text or email reminders might have been  
8  
9  
10 337 helpful to sustain participation. Based on these responses, we modified the  
11  
12 338 protocol to contact all participants approximately 10 days after enrollment to  
13  
14 339 improve engagement and resolve any patient-specific issues in completing the  
15  
16  
17 340 surveys.  
18

19 341

#### 20 21 342 *Clinical outcomes*

22  
23  
24 343 There were no deaths during follow-up. Two (9%) patients experienced at  
25  
26 344 least 1 hospital readmission. Figure 2 depicts the breadth in recovery trajectories  
27  
28 345 in pain, sleep, ability to take care of own hygiene, and perception of overall  
29  
30 346 recovery in five patients with complete response.  
31

32  
33 347

#### 34 348 *Patient perspective*

35  
36  
37 349 An author (LG) participated in this study as he underwent cardiac surgery.  
38  
39  
40 350 He noted that the length and frequency of the questionnaire was reasonable and  
41  
42 351 helped him to be more aware of the recovery process because responding to the  
43  
44 352 questions facilitated introspection on his progress across different domains. He  
45  
46  
47 353 recommended that the study platform feedback the data to study participants,  
48  
49 354 such as a visual summary of the trajectory or response for patients to better  
50  
51 355 gauge their progress. Additionally, he noted that responses may differ across the  
52  
53  
54 356 time of the day, as he was able to better function physically in the afternoon  
55  
56  
57  
58  
59  
60

1  
2  
3 357 compared with in the morning. Finally, he suggested the potential value of  
4  
5 358 reviewing the questionnaire during preoperative counseling to highlight important  
6  
7  
8 359 aspects of recovery to provide better patient and family expectations.  
9

10 360 Investigators plan on providing a brochure to the clinic that contains this  
11  
12 361 information.  
13

14 362

## 17 363 **Discussion**

19 364 This study will provide time-series data on short-term recovery after  
20  
21 365 cardiac surgery using PROM instruments complemented by clinical records  
22  
23 366 obtained via the STS database and electronic health records. This study will  
24  
25  
26 367 provide one of the highest density of postoperative PROM data in existing  
27  
28 368 cardiac surgery literature<sup>3</sup>, and it will characterize the variability in individual  
29  
30 369 recovery processes with a high temporal resolution. This study will be important  
31  
32  
33 370 in closing knowledge gaps around patient-level variations in trajectories because  
34  
35 371 prior studies have mostly focused on changes in PROM scores at a limited  
36  
37  
38 372 number of time points<sup>3</sup> or reporting group-level aggregate of longitudinal recovery  
39  
40 373 data<sup>7, 22</sup>. Because recovery is an individual, variable, and time-dependent  
41  
42 374 process, we designed our data collection and analytical approach to capture such  
43  
44  
45 375 features important to recovery.

46  
47 376 This study has the potential to make a variety of contributions toward  
48  
49 377 improving post-acute phase of care. First, we will be able to develop a  
50  
51 378 preliminary nomogram of postoperative recovery for each domain and overall  
52  
53  
54 379 perception of recovery, which would be instrumental for patients and clinicians to  
55  
56  
57  
58  
59  
60

1  
2  
3 380 gauge the breadth of possible recovery trajectories to facilitate informed shared  
4  
5 381 decision-making. Second, identifying predictors of accelerated or protracted  
6  
7 382 recovery, as classified by group-based trajectory model, may allow for  
8  
9  
10 383 individualized prediction of the postoperative recovery course to better inform the  
11  
12 384 patients and family members. Third, early detection of recovery signals related to  
13  
14 385 adverse events, such as mortality and readmission, may eventually facilitate  
15  
16 386 preemptive intervention and focused monitoring of patients at an elevated risk for  
17  
18  
19 387 such events. Our design of the longitudinal PROM data collection allows for  
20  
21 388 incremental update of such prediction as patients progress through the phase of  
22  
23 389 recovery.

24  
25  
26 390       There are many challenges to the successful acquisition of patient  
27  
28 391 measurements during recovery: efficient administration of PROMs in a way that  
29  
30 392 does not require prohibitive amount of resources, minimizing selection bias  
31  
32 393 originating from barriers to survey completion, handling of missing data that  
33  
34 394 inevitably occurs in PROMs, and summarizing the complex data in a way that is  
35  
36 395 interpretable to surgeons and patients<sup>23</sup>. Additionally, the use of wearables and  
37  
38 396 device data require active patient participation in periodically charging the device,  
39  
40 397 wearing them correctly, and reliably syncing the device to the server for data  
41  
42 398 uploads. Moreover, there is a need to provide value to the patients for providing  
43  
44 399 their recovery profile, such as giving them access to their health data in a  
45  
46 400 meaningful way.

47  
48  
49  
50  
51 401       The resulting data collection, analytical, and output platforms have the  
52  
53 402 potential of being implemented in the clinical setting where an integration of  
54  
55  
56  
57  
58  
59  
60

1  
2  
3 403 incrementally increasing PROM and clinical data provides the near-real time  
4  
5 404 estimate of individual patient risk of adverse post-operative events. Such a model  
6  
7 405 may allow for triggering of preemptive clinical intervention. An output may  
8  
9 406 assimilate a form of clinical dashboard within the electronic health record system,  
10  
11 407 which may be monitored at a centralized location where a trained clinician  
12  
13 408 reviews high-risk cases filtered by the algorithm to further evaluate whether the  
14  
15 409 patient condition warrants an intervention. Together, this workflow has a  
16  
17 410 tremendous potential to improve post-acute phase of care following surgery.  
18  
19  
20  
21

411

#### 412 *Lessons Learned from the initial experience*

26 413 Through this first group of enrolled patients, we learned that most of the  
27  
28 414 patients approached were willing to participate and consented to the study. By  
29  
30 415 streamlining the enrollment process, the enrollment time shortened from over 1  
31  
32 416 hour on the first patient to approximately 10-15 minutes for the current  
33  
34 417 enrollment. The overall response rate is acceptable, with 77% of the participants  
35  
36 418 completing more than half of the delivered surveys independently without any  
37  
38 419 intervention by researchers. Challenging recovery course, including readmissions  
39  
40 420 may have interfered with patient engagement. While this would have resulted in  
41  
42 421 an underrepresentation of those with protracted recovery or with complications,  
43  
44 422 our preliminary data show we were able to capture variations in the trajectories of  
45  
46 423 recovery.

51 424 To sustain patient engagement through challenging recovery course, we  
52  
53 425 implemented a protocol for a research assistant to call the patient around 10  
54  
55  
56  
57  
58  
59  
60

1  
2  
3 426 days after enrollment to troubleshoot any issues and reemphasize the  
4  
5 427 importance of their participation. We believe that once the survey becomes part  
6  
7 428 of clinical workflow with clinicians monitoring and responding to the PROM  
8  
9  
10 429 response, patient response rate would improve further.

11  
12 430 We modified the enrollment protocol to reduce the enrollment time,  
13  
14 431 because to some patients, the complexity and prolonged time spent for  
15  
16 432 enrollment discouraged signups. Initial protocol for enrollment required patients  
17  
18 433 to download an app and register. This resulted in a wide range of time spent for  
19  
20 434 enrollment between 15 minutes and 90 minutes, with longer enrollment owing to  
21  
22 435 technical challenges. These challenges include patients forgetting the password  
23  
24 436 for app download, having to reset the password, and not having immediate email  
25  
26 437 access to check account confirmation emails. Because our cardiac surgery  
27  
28 438 patient population tended to be older, these technical challenges may have been  
29  
30  
31 439 pronounced. By not including the app download and allowing for the research  
32  
33 440 assistant to enroll the patient via an online form with their permission, the  
34  
35 441 enrollment time shortened significantly to 10-15 minutes.

36  
37  
38 442 Examining the initial individual data on recovery, there were wide  
39  
40 443 variations in the trajectories of recovery even among only 5 patients. The  
41  
42 444 variation suggests that the instrument we used was sensitive to capturing such  
43  
44 445 differences. We also noted variations in improvement over time across different  
45  
46 446 domains of recovery, where overall perception of recovery seemed to have a  
47  
48 447 steady improvement pattern, while pain varied between consecutive  
49  
50 448 measurements in some patients.  
51  
52  
53  
54  
55  
56  
57  
58  
59  
60

1  
2  
3 4494  
5 450 *Limitations*

6  
7 451           There are several limitations to this study. First, the single-center tertiary  
8  
9 452 care setting limits the sample size and applicability of the findings to patients  
10  
11 453 cared for in different settings. A multi-center study following the current study  
12  
13 454 would address this limitation and evaluate whether the findings at our center are  
14  
15 455 comparable to findings in other centers. Additionally, group-based trajectory  
16  
17 456 modeling will classify patients into distinct trajectories based on similar recovery  
18  
19 457 patterns, and this analytical approach may allow for generalization of the  
20  
21 458 variations in the trajectories as long as our sample represents the breadth of the  
22  
23 459 possible variation in recovery.

24  
25 460           Another limitation is the exclusion of patients who cannot participate for  
26  
27 461 various reasons. The use of digital platform is advantageous in reducing the  
28  
29 462 resource intensity for data collection, but leads to exclusion of patients who do  
30  
31 463 not own mobile devices, which likely affects older patients disproportionately. As  
32  
33 464 the number of adults using mobile devices is increasing<sup>24</sup>, we believe this will  
34  
35 465 become less of a limitation over time. Initiating this study now despite this  
36  
37 466 limitation is important to establish a platform that may become the standard of  
38  
39 467 postoperative care when the vast majority of patient population own digital  
40  
41 468 devices in a predictably near future. Those who cannot participate due to lack of  
42  
43 469 interest represent an important population that may be distinct in characteristics  
44  
45 470 and risk profiles. We plan on minimizing the non-participation for the lack of  
46  
47 471 interest by intermittent phone check-ins to sustain interests and identify barriers  
48  
49  
50  
51  
52  
53  
54  
55  
56  
57  
58  
59  
60



1  
2  
3 472 to inform strategies to increase engagement. In following studies, we may  
4  
5 473 consider other forms of incentives to participate, if this population is indeed  
6  
7 474 distinct and large in proportion. Additionally, when the PROM data are integrated  
8  
9  
10 475 into routine clinical care, patient engagement will likely increase substantially  
11  
12 476 because they will be more inspired to share these data if they are used by their  
13  
14 477 clinicians.

15  
16  
17 478 Finally, postoperative enrollment and retrospective assessment of  
18  
19 479 preoperative health status, as opposed to preoperative enrollment, may introduce  
20  
21 480 recall bias. We decided on postoperative enrollment, because preoperative  
22  
23 481 enrollment precluded standardized enrollment of patients operated on under non-  
24  
25 482 elective settings. Given the retrospective assessment of baseline health status  
26  
27 483 takes place on the first postoperative survey, we believe the recall bias is  
28  
29 484 minimized owing to the temporal proximity.

30  
31  
32  
33 485

## 34 35 486 **Conclusion**

36  
37 487 This study will generate highly granular, longitudinal PROM data to  
38  
39 488 characterize individual trajectories of patient recovery after cardiac surgery.  
40  
41 489 Digital data sharing platforms promise to minimize the patient and researcher  
42  
43 490 burden in administering and completing PROMs, allowing for characterization of  
44  
45 491 granular progression of patients' state of health over time in the postoperative  
46  
47 492 period. Implementation of such study is complex but feasible, and it will serve as  
48  
49 493 an important platform to facilitate clinical use of PROM data to improve the  
50  
51 494 overall patient recovery.  
52  
53  
54  
55  
56  
57  
58  
59  
60

1  
2  
3 495  
4

5 496 **Authors contributions**  
6  
7

8 497 MM, HMK, SD, and AG developed the study and research question. MM  
9  
10 498 and HMK developed analytical strategy with inputs from BJM, GCL, and  
11  
12 499 YZ. SIC and ES guided refining the enrollment strategy and interpretation  
13  
14 500 of the phone interview responses. LAG provided patient perspective on the  
15  
16 501 study protocol and interpretation of the preliminary results. All authors  
17  
18 502 developed and approved the final manuscript before submission.  
19  
20 503

21 504 **Funding statement**  
22

23  
24 505 This publication was made possible by K12HL138046 by the National Institutes  
25 506 of Health (NIH) and the Yale Clinical and Translational Science Award, grant  
26 507 UL1TR001863, from the National Center for Advancing Translational Science, a  
27 508 component of the NIH.  
28  
29 509

30  
31 510 **Competing interest statement**  
32

33 511 Dr. Chaudhry is a paid reviewer for the CVS Caremark State of CT Clinical  
34 512 Pharmacy Program.  
35 513 Dr. Mortazavi is supported in part by the Center for Remote Health Technologies  
36 514 and Systems and Texas A&M University, as well as awards 1R01EB028106-01  
37 515 and 1R21EB028486-01 from the National Institute for Biomedical Imaging and  
38 516 Bioengineering (NIBIB) for work employing machine learning on health data. Dr.  
39 517 Mortazavi reported having a patent US10201746B1 approved for "Near-realistic  
40 518 sports motion analysis and activity monitoring" and a patent to  
41 519 US20180315507A1 is pending.  
42  
43 520 Dr. Krumholz works under contract with the Centers for Medicare & Medicaid  
44 521 Services to support quality measurement programs; was a recipient of a research  
45 522 grant, through Yale, from Medtronic and the U.S. Food and Drug Administration to  
46 523 develop methods for post-market surveillance of medical devices; was a recipient of  
47 524 a research grant with Medtronic and is the recipient of a research grant from Johnson  
48 525 & Johnson, through Yale University, to support clinical trial data sharing; was a  
49 526 recipient of a research agreement, through Yale University, from the Shenzhen  
50 527 Center for Health Information for work to advance intelligent disease prevention and  
51 528 health promotion; collaborates with the National Center for Cardiovascular Diseases  
52 529 in Beijing; receives payment from the Arnold & Porter Law Firm for work related to  
53 530 the Sanofi clopidogrel litigation, from the Ben C. Martin Law Firm for work related to  
54 531 the Cook Celect IVC filter litigation, and from the Siegfried and Jensen Law Firm for  
55 532 work related to Vioxx litigation; chairs a Cardiac Scientific Advisory Board for  
56  
57  
58  
59  
60

1  
2  
3 533 UnitedHealth; was a participant/participant representative of the IBM Watson Health  
4 534 Life Sciences Board; is a member of the Advisory Board for Element Science, the  
5 535 Advisory Board for Facebook, and the Physician Advisory Board for Aetna; and is the  
6 536 co-founder of HugoHealth, a personal health information platform, and co-founder of  
7 537 Refactor Health, an enterprise healthcare AI-augmented data management company.  
8 538  
9 539

## 540 **References**

- 541 1. Wadhera RK, Yeh RW and Joynt Maddox KE. The Rise and Fall of  
542 Mandatory Cardiac Bundled Payments. *JAMA*. 2018;319:335-336.
- 543 2. Khera R, Dharmarajan K, Wang Y, Lin Z, Bernheim SM, Normand ST and  
544 Krumholz HM. Association of the Hospital Readmissions Reduction Program  
545 With Mortality During and After Hospitalization for Acute Myocardial Infarction,  
546 Heart Failure, and Pneumonia. *JAMA Netw Open*. 2018;1:e182777.
- 547 3. Mori M, Angraal S, Chaudhry SI, Suter LG, Geirsson A, Wallach JD and  
548 Krumholz HM. Characterizing Patient-Centered Postoperative Recovery After  
549 Adult Cardiac Surgery: A Systematic Review. *J Am Heart Assoc*.  
550 2019;8:e013546.
- 551 4. Gill TM, Gahbauer EA, Han L and Allore HG. Trajectories of disability in  
552 the last year of life. *N Engl J Med*. 2010;362:1173-80.
- 553 5. Pakhomov SV, Jacobsen SJ, Chute CG and Roger VL. Agreement  
554 between patient-reported symptoms and their documentation in the medical  
555 record. *Am J Manag Care*. 2008;14:530-9.
- 556 6. Moore FD. Getting well: the biology of surgical convalescence. *Ann N Y*  
557 *Acad Sci*. 1958;73:387-400.
- 558 7. Diab MS, Bilkhu R, Soppa G, Edsell M, Fletcher N, Heiberg J, Royse C  
559 and Jahangiri M. The influence of prolonged intensive care stay on quality of life,  
560 recovery, and clinical outcomes following cardiac surgery: A prospective cohort  
561 study. *J Thorac Cardiovasc Surg*. 2018;156:1906-1915.e3.
- 562 8. Thourani VH, Badhwar V, Shahian DM, O'Brien S, Kitahara H, Vemulapalli  
563 S, Brennan JM, Habib RH, Fernandez F, D'Agostino RS, Lobdell K, Rankin JS,  
564 Gammie JS, Higgins R, Sabik J, Schwann TA and Jacobs JP. The Society of  
565 Thoracic Surgeons Adult Cardiac Surgery Database: 2019 Update on Research.  
566 *Ann Thorac Surg*. 2019;108:334-342.
- 567 9. Blanche C, Blanche DA, Kearney B, Sandhu M, Czer LS, Kamlot A,  
568 Hickey A and Trento A. Heart transplantation in patients seventy years of age  
569 and older: A comparative analysis of outcome. *J Thorac Cardiovasc Surg*.  
570 2001;121:532-41.
- 571 10. Dahlberg K, Jaensson M, Eriksson M and Nilsson U. Evaluation of the  
572 Swedish Web-Version of Quality of Recovery (SwQoR): Secondary Step in the  
573 Development of a Mobile Phone App to Measure Postoperative Recovery. *JMIR*  
574 *research protocols*. 2016;5:e192.
- 575 11. Jaensson M, Dahlberg K, Eriksson M and Nilsson U. Evaluation of  
576 postoperative recovery in day surgery patients using a mobile phone application:  
577 a multicentre randomized trial. *Br J Anaesth*. 2017;119:1030-1038.

- 1  
2  
3 578 12. Halleberg Nyman M, Nilsson U, Dahlberg K and Jaensson M. Association  
4 579 Between Functional Health Literacy and Postoperative Recovery, Health Care  
5 580 Contacts, and Health-Related Quality of Life Among Patients Undergoing Day  
6 581 Surgery: Secondary Analysis of a Randomized Clinical Trial. *JAMA Surg.*  
7 582 2018;153:738-745.  
8  
9 583 13. Myles PS, Weitkamp B, Jones K, Melick J and Hensen S. Validity and  
10 584 reliability of a postoperative quality of recovery score: the QoR-40. *Br J Anaesth.*  
11 585 2000;84:11-5.  
12 586 14. O'Brien SM, Feng L, He X, Xian Y, Jacobs JP, Badhwar V, Kurlansky PA,  
13 587 Furnary AP, Cleveland JC, Lobdell KW, Vassileva C, Wyler von Ballmoos MC,  
14 588 Thourani VH, Rankin JS, Edgerton JR, D'Agostino RS, Desai ND, Edwards FH  
15 589 and Shahian DM. The Society of Thoracic Surgeons 2018 Adult Cardiac Surgery  
16 590 Risk Models: Part 2-Statistical Methods and Results. *Ann Thorac Surg.*  
17 591 2018;105:1419-1428.  
18  
19 592 15. Loughran T and Nagin DS. Finite Sample Effects in Group-Based  
20 593 Trajectory Models. *Sociological Methods & Research.* 2006;35:250-278.  
21 594 16. Nagin DS and Odgers CL. Group-based trajectory modeling in clinical  
22 595 research. *Annu Rev Clin Psychol.* 2010;6:109-38.  
23 596 17. Savage SA, Sumislawski JJ, Bell TM and Zarzaur BL. Utilizing Group-  
24 597 based Trajectory Modeling to Understand Patterns of Hemorrhage and  
25 598 Resuscitation. *Ann Surg.* 2016;264:1135-1141.  
26  
27 599 18. Leffondré K, Abrahamowicz M, Regeasse A, Hawker GA, Badley EM,  
28 600 McCusker J and Belzile E. Statistical measures were proposed for identifying  
29 601 longitudinal patterns of change in quantitative health indicators. *J Clin Epidemiol.*  
30 602 2004;57:1049-62.  
31  
32 603 19. Hartigan JA and Wong MA. Algorithm AS 136: A K-Means Clustering  
33 604 Algorithm. *Applied Statistics.* 1979;28:100--108.  
34 605 20. Jones BL, Nagin DS and Roeder K. A SAS Procedure Based on Mixture  
35 606 Models for Estimating Developmental Trajectories. *Sociological Methods &*  
36 607 *Research.* 2001;29:374-393.  
37  
38 608 21. Haviland AM, Jones BL and Nagin DS. Group-based Trajectory Modeling  
39 609 Extended to Account for Nonrandom Participant Attrition. *Sociological Methods &*  
40 610 *Research.* 2011;40:367-390.  
41 611 22. Petersen J, Vettorazzi E, Winter L, Schmied W, Kindermann I and  
42 612 Schäfers HJ. Physical and mental recovery after conventional aortic valve  
43 613 surgery. *J Thorac Cardiovasc Surg.* 2016;152:1549-1556.e2.  
44  
45 614 23. Calvert M, Kyte D, Price G, Valderas JM and Hjollund NH. Maximising the  
46 615 impact of patient reported outcome assessment for patients and society. *BMJ.*  
47 616 2019;364:k5267.  
48 617 24. Anderson M, Perrin A. Tech Adoption Climbs Among Older Adults.  
49 618 [https://www.pewinternet.org/wp-](https://www.pewinternet.org/wp-content/uploads/sites/9/2017/05/PI_2017.05.17_Older-Americans-Tech_FINAL.pdf)  
50 619 [content/uploads/sites/9/2017/05/PI\\_2017.05.17\\_Older-Americans-](https://www.pewinternet.org/wp-content/uploads/sites/9/2017/05/PI_2017.05.17_Older-Americans-Tech_FINAL.pdf)  
51 620 [Tech\\_FINAL.pdf](https://www.pewinternet.org/wp-content/uploads/sites/9/2017/05/PI_2017.05.17_Older-Americans-Tech_FINAL.pdf). Published 2017. Accessed March 30, 2019.  
52 621  
53 622  
54  
55  
56  
57  
58  
59  
60

1  
2  
3 623  
4  
5 624  
6  
7  
8  
9  
10  
11  
12  
13  
14  
15  
16  
17  
18  
19  
20  
21  
22  
23  
24  
25  
26  
27  
28  
29  
30  
31  
32  
33  
34  
35  
36  
37  
38  
39  
40  
41  
42  
43  
44  
45  
46  
47  
48  
49  
50  
51  
52  
53  
54  
55  
56  
57  
58  
59  
60

For peer review only

625 **Tables and Figures**

626 Table 1: Candidate predictors of recovery trajectory

| <b>Demographic</b>                 | <b>Comorbidity</b>       | <b>Operative factors</b>    | <b>Postoperative factors</b> |
|------------------------------------|--------------------------|-----------------------------|------------------------------|
| Age                                | Diabetes                 | Cardiopulmonary bypass time | Length of ICU stay           |
| Sex                                | Prior stroke             | Cross clamp time            | Length of hospital stay      |
| Race                               | Congestive heart failure | Operation type              | Surgical site infection      |
| Insurance status                   | Chronic kidney disease   | Non-elective status         | Prolonged ventilation        |
| BMI                                | Dialysis                 | Transfusion requirement     | Transfusion requirement      |
|                                    | Prior MI                 | Minimally invasive approach | Stroke                       |
|                                    | Prior cardiac surgery    |                             | Reoperation for any reasons  |
|                                    | Ejection fraction        |                             | Death                        |
|                                    | Arrhythmias              |                             | Readmission                  |
|                                    | Prior PCI                |                             | Pneumonia                    |
|                                    | Cardiogenic shock        |                             |                              |
|                                    | Hypertension             |                             |                              |
|                                    | Dyslipidemia             |                             |                              |
|                                    | Smoking status           |                             |                              |
|                                    | Chronic lung disease     |                             |                              |
|                                    | Endocarditis             |                             |                              |
| Pneumonia                          |                          |                             |                              |
| Peripheral artery disease          |                          |                             |                              |
| Immunocompromised                  |                          |                             |                              |
| Mechanical circulatory support use |                          |                             |                              |
| Valvular disease severity          |                          |                             |                              |

627

628

629 Table 2: 24 features of trajectory used in group-based trajectory model

| N  | Features                                                                           |
|----|------------------------------------------------------------------------------------|
| 1  | Range                                                                              |
| 2  | Mean-over-time                                                                     |
| 3  | Standard deviation (SD)                                                            |
| 4  | Coefficient of variation (CV)                                                      |
| 5  | Change                                                                             |
| 6  | Mean change per unit time                                                          |
| 7  | Change relative to the first score                                                 |
| 8  | Change relative to the mean over time                                              |
| 9  | Slope of the linear model                                                          |
| 10 | Proportion of variance explained by the linear model                               |
| 11 | Maximum of the first differences                                                   |
| 12 | SD of the first differences                                                        |
| 13 | SD of the first differences per time unit                                          |
| 14 | Mean of the absolute first differences                                             |
| 15 | Maximum of the absolute first differences                                          |
| 16 | Ratio of the maximum absolute difference to the mean-over-time                     |
| 17 | Ratio of the maximum absolute first difference to the slope                        |
| 18 | Ratio of the SD of the first differences to the slope                              |
| 19 | Mean of the second differences                                                     |
| 20 | Mean of the absolute second differences                                            |
| 21 | Maximum of the absolute second differences                                         |
| 22 | Ration of the maximum absolute second difference to the mean-over-time             |
| 23 | Ratio of the maximum absolute second difference to mean absolute first difference  |
| 24 | Ratio of the mean absolute second difference to the mean absolute first difference |

630

631 Figure 1: Timing of patient enrollment and PROM administration

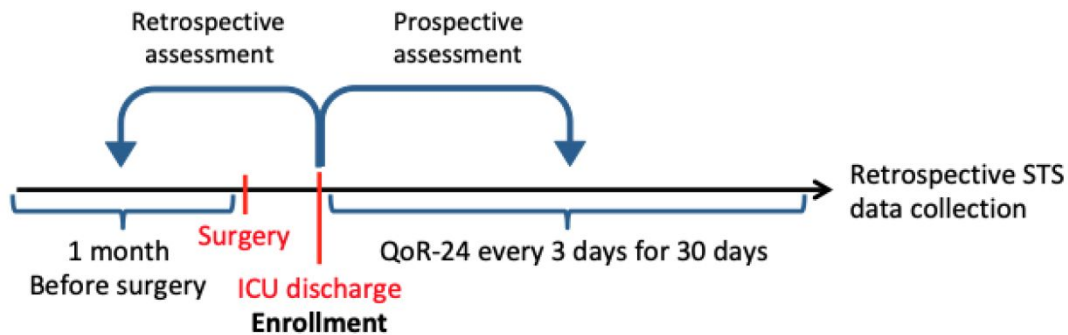

632

633 The figure shows the timing of patient enrollment and PROM administration over  
 634 the clinical course. Baseline function is assessed by retrospectively asking the  
 635 patient about their state of health during 1 month prior to the operation. 24-item  
 636 Quality of Recovery questionnaire is administered every 3 days for 30 days  
 637 following discharge from the intensive care unit.

638

639 Figure 2: Sample trajectories of recovery in 5 patients

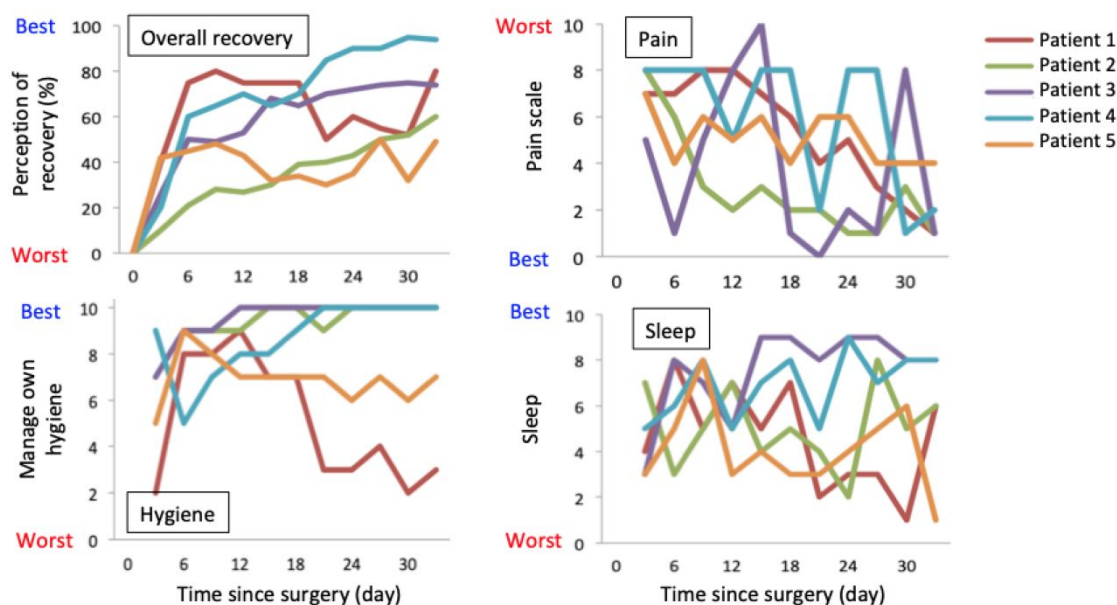

640

641 The figures display trajectories of recovery in different domains in 5 patients.  
 642 Each color corresponds to the same patient. Overall recovery is the patient's  
 643 perception of overall recovery in 0 to 100% scale. Pain in surgical site is reported  
 644 in 0 to 10 point scale, with 10 representing the worst pain. Being able to take care  
 645 of own hygiene is reported in 0 to 10 point scale, with 10 representing complete  
 646 independence in managing own hygiene. Patient's perception of sleep quality is  
 647 reported in 0 to 10 point scale, with 10 being the best sleep.



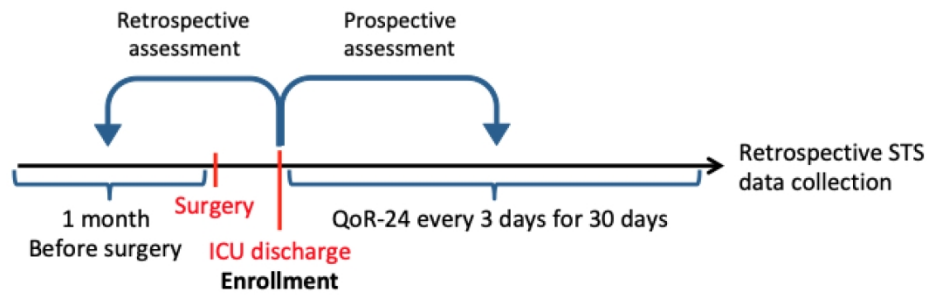

The figure shows the timing of patient enrollment and PROM administration over the clinical course. Baseline function is assessed by retrospectively asking the patient about their state of health during 1 month prior to the operation. 24-item Quality of Recovery questionnaire is administered every 3 days for 30 days following discharge from the intensive care unit.

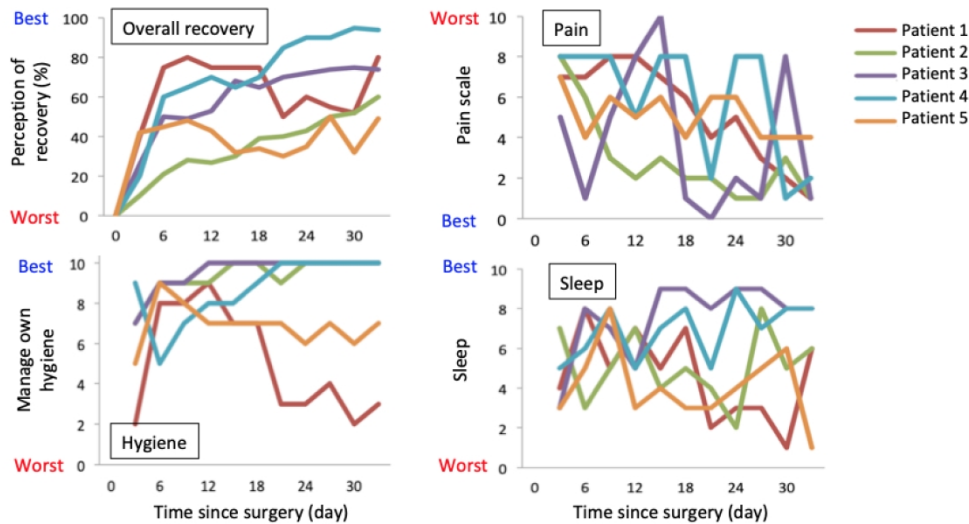

The figures display trajectories of recovery in different domains in 5 patients. Each color corresponds to the same patient. Overall recovery is the patient's perception of overall recovery in 0 to 100% scale. Pain in surgical site is reported in 0 to 10 point scale, with 10 representing the worst pain. Being able to take care of own hygiene is reported in 0 to 10 point scale, with 10 representing complete independence in managing own hygiene. Patient's perception of sleep quality is reported in 0 to 10 point scale, with 10 being the best sleep.

## Modification of Quality of Recovery (QoR-24) Questionnaire

\*Answered in visual analogue scale: 0 [none of the time] to 10 [all of the time]

*'During the last 24 hours, I have been...'*

### *Modified:*

1. Able to breathe easily
2. Having normal bowel function
3. Able to enjoy food
4. Speaking normally
5. Able to think clearly
6. Able to remember things
7. Able to make decisions quickly
8. Able to take care of own hygiene
9. Able to write
10. Able to dress easily
11. Having pain in the surgical wound
12. Having nausea
13. Shivering or twitching
14. Feeling dizzy
15. Feeling restless
16. Feeling rested
17. Feeling depressed
18. Feeling lonely
19. Having anxiety
20. Sleeping well
21. Difficulties getting to sleep
22. What time did you fall asleep? What time did you wake up without going back to sleep?
23. How much do you think you have recovered? (0-100%)
24. Open ended question: 'Please describe what you are feeling (good and bad), what bothers you, and what has been helpful to your recovery'

HIC#:

1  
2  
3 **COMPOUND AUTHORIZATION AND CONSENT FOR PARTICIPATION IN A**  
4 **RESEARCH PROJECT**  
5 **200 FR. 4 (2016-2)**  
6 **YALE UNIVERSITY SCHOOL OF MEDICINE – YALE-NEW HAVEN HOSPITAL**  
7  
8  
9

10 **Study Title:** Understanding Recovery After Cardiac Surgery  
11

12 **Principal Investigator:** Arnar Geirsson, MD  
13

14 Associate Professor of Surgery (Cardiac)

15 Yale School of Medicine

16 Best Contact Number: 475-201-8349  
17

18 **Funding Source:** None  
19

20 **What is this study about?**  
21

22  
23 You are invited to take part in a research study to understand how you recover after heart  
24 surgery. We use an app to centralize your healthcare information from multiple sources so it is  
25 easy for you and researchers to understand your health status and how you are doing after the  
26 surgery. You have been asked to take part in this study because you are planned to undergo or  
27 have undergone cardiac surgery at Yale New Haven Hospital (YNHH). If you agree to take part  
28 in this study, you will be asked to answer questionnaire through a mobile application platform  
29 called Hugo. Through Hugo, you will be asked to answer short questionnaires on your  
30 smartphone or email for up to 90 days.  
31  
32

33 This research study will examine the ability of the mobile health application, Hugo, to  
34 quickly and securely obtain healthcare information from multiple sources to monitor your  
35 outcomes after a procedure. Among the advantages of this system are that, with your permission,  
36 we will be able to access your records at multiple health systems. The risks for this study are  
37 similar to the risks associated with traditional research methods: you are sharing your personal  
38 health information with researchers and there is a risk to your privacy. However, researchers will  
39 only be able to view the health data that you sync with the Hugo platform. There will also be  
40 audit logs of who has accessed your data via Hugo and other safeguards that do not exist with  
41 paper and faxed records. Researchers will also access your records within the YNHH electronic  
42 medical record (EMR) system. This access is to allow the researchers to confirm that your data  
43 has fully come into the Hugo, and that there are no major missing data points.  
44  
45  
46

47 In order to decide whether you would like to be a part of this research study you should  
48 know enough about its risks and benefits to make an informed decision. This consent form gives  
49 you detailed information about the study, which a member of the research team will discuss with  
50 you. This discussion should review all aspects of this research, especially the confidentiality  
51 risks of you having personal health information on your mobile device.  
52  
53  
54  
55  
56  
57  
58  
59  
60

## How is this study conducted?

### *Setup process*

The initial set up process will take about 30 minutes in total and entails the following:

1. Using your own mobile device, a research associate (RA) will help you with the registration process for the mobile platform Hugo. Hugo will be downloaded from Google Play Store or Apple app store. Registration for Hugo will ask for basic information including first name, last name, email address, and to choose a password. You will then be prompted to accept standard terms and conditions and a privacy notice for the Hugo platform.
2. You will check your email and click the confirmation link to activate your new Hugo account.
3. The Hugo mobile application will prompt you to link your patient portal accounts by presenting a list of participating health systems. You can select the systems where you have received care and enter your patient portal credentials (all of these are password-protected).
4. You will be asked to agree to share data from Hugo. The medical record data being shared may include Medications, Problems, Allergies, Procedures, Encounters, Lab Results, Diagnoses, Vital Signs, Notes, and possibly other data that becomes available.
5. The questionnaires will be delivered to you via email or text, whichever you prefer.
6. We are asking your permission at the end of this consent form to give the researchers permission to see health information that you sync and share via the Hugo app along with your YNHH medical record.

***Please note:*** The investigators of this study will not be watching or evaluating your symptoms as part of this study, including those that you reply to on the questionnaires. If at any point you begin to experience new symptoms or any medical issues arise, **please contact your doctor or call 911 immediately.**

### *Continuous Study Process*

After the initial in office set up is complete you will be asked to answer questionnaires periodically until the study completion. If you have any questions or experience technical issues at any time, please reach out to the study team via email at [makoto.mori@yale.edu](mailto:makoto.mori@yale.edu):

- An RA will follow up in-person with you the day after you are transferred out of the intensive care unit to make sure your accounts and applications are working correctly, and to answer any additional questions you may have.

HIC#:

- Short questionnaires will be sent to your email or text, depending on your preference, initially every 3 days and eventually every 2 weeks up to 90 days following the surgery. This questionnaire should take around 4 minutes on average to complete. The RA may also call you or reach out via email to check in about any technical issues.
- You will receive reminder emails from the Hugo application 1 and 2 days after your questionnaires are sent, reminding you to complete them. These are automated messages and will be sent even if you have completed the surveys. You will also receive reminder messages to use & sync your provided devices.

### **New Information**

You will be informed of anything that happens during the study that may cause you to re-think your decision to continue participation.

### **Risks and Inconveniences**

The risk to patient privacy is that of any computer system that collects personally identifiable information or protected health information. The Hugo application, like many other personal health record applications, is not a covered entity; this means that the HIPAA privacy rule does not apply to this platform. The Hugo platform takes all necessary precautions, including industry-standard encryption, to minimize privacy and security risks to personally identifiable information stored on behalf of study participants. Hugo makes publicly available its Security Statement (<http://hugophr.com/security>), its Privacy Notice (<http://hugophr.com/privacy-notice>), and Terms of Service (<http://hugophr.com/terms-of-service/>). Access to your YNHH medical record will only be within the Epic electronic medical records system; information will not be entered or removed.

You will be asked to volunteer your time to answer questions, and this is considered inconvenience.

There is no extra procedure or medications given for this study, and being on this study does not alter your care from the care you would receive had you not participated in this study.

### **Benefits**

A possible benefit of this study is that you will have easy access to the information contained in your Yale New Haven Health and outside health records that may exist at other participating health systems. Seeing the summary of questionnaire response may also help you and the family to gain awareness and information regarding your health.

You will still be responsible for any costs associated with routine follow-ups or doctor visits, but there will be no additional follow-ups or doctor visits necessary for this study. You are responsible for data charges that may be incurred for utilizing online features of the Hugo when not connected to Wi-Fi.

### **Treatment Alternatives/Alternatives**

If you decide not to participate in this study, you will still have access to your medical records as you would normally. The alternative is to not to participate.

### **Confidentiality and Privacy**

The risk to patient privacy is no different with this study than it is with any other study that securely collects and appropriately stores personally identifiable information or protected health information. Any data transferred as part of the research protocol will be sent via secure and encrypted standard methods. Any identifiable information that is obtained in connection with this study will remain confidential and will be disclosed only with your permission. When the results of the research are published, or discussed in conferences, no information will be included that would reveal your identity, unless your specific consent is obtained.

The information about your health that will be collected in this study includes:

- Electronic medical records from health systems that you import into the Hugo Health, including from Yale New Haven Health system
- Mobile questionnaires that you respond to
- Records about phone calls or emails made as part of this research
- Records about your clinical visits
- Pre-operative, intra-operative and discharge notes within Hugo or the YNHH Electronic Medical Record

Information about you and your health which might identify you may be used by or given to:

1. Representatives from Yale University, the Yale Human Research Protection Program and the Yale Human Investigation Committee (the committee that reviews, approves, and monitors research on human subjects), who are responsible for ensuring research compliance. These individuals are required to keep all information confidential.
2. The Principal Investigator, along with other research staff and collaborators who are assisting with this study
3. Me2Health, the company that owns the mobile application for troubleshooting purposes
4. Health care providers who provide services to you in connection with this study

All health care providers subject to HIPAA (Health Insurance Portability and Accountability Act) are required to protect the privacy of your information. The research staff at the Yale School of Medicine are required to comply with HIPAA and to ensure the confidentiality of your information. Some of the individuals or agencies listed above may not be subject to HIPAA and, therefore, may not be required to provide the same type of confidentiality protection. They could use or disclose your information in ways not mentioned in this form. However, to better protect your health information, agreements are in place with these individuals and/or companies that require that they keep your information confidential. In addition, note that the Hugo is not

HIC#:

1  
2  
3 required to comply with HIPAA but is required to maintain the confidentiality of your  
4 information as described in the privacy notice to be provided when you sign up for Hugo.  
5

6 This authorization to use and disclose your health information collected during your participation  
7 in this study will never expire.  
8  
9

### 10 **Voluntary Participation and Withdrawal**

11  
12 Participating in this study is voluntary and you are free to choose not to take part in this study.  
13 **Declining to participate or withdrawing will involve no penalty or loss of benefits to which**  
14 **you are otherwise entitled** (such as your health care outside the study, the payment for your  
15 health care, and your health care benefits). It will not harm your relationship with your own  
16 doctors or with Yale-New Haven Health or the care that you receive.  
17  
18

19 If you do become a study participant, you are free to stop and withdraw from this study at any  
20 time during its course.  
21

22  
23 To withdraw from the study, you can call a member of the research team to let them know that  
24 you would no longer like to take part. The telephone number to do this is 475-201-8349. You  
25 may also email the intent to makoto.mori@yale.edu.  
26

27 When you withdraw from this study, no new health information identifying you will be gathered  
28 after that date. Information that has already been collected may still be used until the end of the  
29 research study, as necessary to ensure the integrity of the study and/or study oversight.  
30  
31

### 32 **Questions**

33  
34 We have used some technical terms in this form. Please feel free to ask about anything you don't  
35 understand and to consider this research and the consent form carefully – as long as you feel is  
36 necessary – before you make a decision.  
37  
38  
39  
40  
41  
42  
43  
44  
45  
46  
47  
48  
49  
50  
51  
52  
53  
54  
55  
56  
57  
58  
59  
60



### Authorization and Permission

I have read (or someone has read to me) this form and have decided to participate in the project described above. Its general purposes, the particulars of my involvement and possible hazards and inconveniences have been explained to my satisfaction. My signature also indicates that I have received a copy of this consent form.

By signing this form, I give permission to the researchers to use [and give out] information about me for the purposes described in this form. By refusing to give permission, I understand that I will not be able to be in this research.

Print Name of Participant: \_\_\_\_\_

Signature: \_\_\_\_\_

Date: \_\_\_\_\_

If after you have signed this form you have any questions about your privacy rights, please contact the Yale Privacy Officer at 203-432-5919.

If you have further questions about this project or if you have a research-related problem, you may contact the Research Associate, Makoto Mori, at 475-201-8349 or at [makoto.mori@yale.edu](mailto:makoto.mori@yale.edu). If you would like to talk with someone other than the researchers to discuss problems, concerns, and questions you may have concerning this research, or to discuss your rights as a research participant, you may contact the Yale Human Investigation Committee at 203-785-4688.

## Hugo recovery interview guide

### Logistics:

- Email or call patient with response rate <50% to set up time or proceed directly with interview
- The interview likely takes 10-15 minutes
- Likely use Zoom to record interview

### Before interview:

- Make clear that the intent is to learn from the interview and no hard feelings about not being able to complete the survey
- Make clear that honest opinion is most helpful for us to improve

### Interview guide:

- What challenges or difficulties did you have in completing surveys?
- Did you know that surveys were emailed/texted to you? (How often do you check your email/texts?)
- What would have helped to engage you better? (better interface, better explanations of the study, why the study is important, other incentives, etc)
- Were there any technical issues with the surveys? (email/text didn't deliver, interface was not friendly, etc)
- Would reminder emails have been helpful?
- Were there too many questions?
- Did any questions feel irrelevant to you?

# BMJ Open

## Protocol for Project Recovery: Cardiac Surgery – A Single-center Cohort Study Leveraging Digital Platform to Characterize Longitudinal Patient-Reported Postoperative Recovery Patterns

|                                 |                                                                                                                                                                                                                                                                                                                                                                                                                                                                                                                                                                                                                                                                                                  |
|---------------------------------|--------------------------------------------------------------------------------------------------------------------------------------------------------------------------------------------------------------------------------------------------------------------------------------------------------------------------------------------------------------------------------------------------------------------------------------------------------------------------------------------------------------------------------------------------------------------------------------------------------------------------------------------------------------------------------------------------|
| Journal:                        | <i>BMJ Open</i>                                                                                                                                                                                                                                                                                                                                                                                                                                                                                                                                                                                                                                                                                  |
| Manuscript ID                   | bmjopen-2020-036959.R1                                                                                                                                                                                                                                                                                                                                                                                                                                                                                                                                                                                                                                                                           |
| Article Type:                   | Protocol                                                                                                                                                                                                                                                                                                                                                                                                                                                                                                                                                                                                                                                                                         |
| Date Submitted by the Author:   | 13-Jul-2020                                                                                                                                                                                                                                                                                                                                                                                                                                                                                                                                                                                                                                                                                      |
| Complete List of Authors:       | Mori, Makoto; Yale School of Medicine, Cardiac Surgery<br>Brooks, Cornell; Yale School of Medicine, Cardiac Surgery<br>Spatz, Erica; Yale University, Section of Cardiovascular Medicine; Yale University School of Medicine, Center for Outcomes Research and Evaluation<br>Mortazavi, Bobak; Texas A&M University System, Computer Science and Engineering<br>Dhruva, Sanket; University of California San Francisco<br>Linderman, George; Yale School of Medicine<br>Grab, Lawrence; Yale School of Medicine<br>Zhang, Yawei; School of Public Health,<br>Geirsson, Arnar; Yale School of Medicine<br>Chaudhry, Sarwat; Yale School of Medicine<br>Krumholz, Harlan; Yale School of Medicine, |
| <b>Primary Subject Heading</b>: | Surgery                                                                                                                                                                                                                                                                                                                                                                                                                                                                                                                                                                                                                                                                                          |
| Secondary Subject Heading:      | Cardiovascular medicine                                                                                                                                                                                                                                                                                                                                                                                                                                                                                                                                                                                                                                                                          |
| Keywords:                       | Cardiac surgery < SURGERY, Quality in health care < HEALTH SERVICES ADMINISTRATION & MANAGEMENT, Telemedicine < BIOTECHNOLOGY & BIOINFORMATICS                                                                                                                                                                                                                                                                                                                                                                                                                                                                                                                                                   |
|                                 |                                                                                                                                                                                                                                                                                                                                                                                                                                                                                                                                                                                                                                                                                                  |

SCHOLARONE™  
Manuscripts



I, the Submitting Author has the right to grant and does grant on behalf of all authors of the Work (as defined in the below author licence), an exclusive licence and/or a non-exclusive licence for contributions from authors who are: i) UK Crown employees; ii) where BMJ has agreed a CC-BY licence shall apply, and/or iii) in accordance with the terms applicable for US Federal Government officers or employees acting as part of their official duties; on a worldwide, perpetual, irrevocable, royalty-free basis to BMJ Publishing Group Ltd ("BMJ") its licensees and where the relevant Journal is co-owned by BMJ to the co-owners of the Journal, to publish the Work in this journal and any other BMJ products and to exploit all rights, as set out in our [licence](#).

The Submitting Author accepts and understands that any supply made under these terms is made by BMJ to the Submitting Author unless you are acting as an employee on behalf of your employer or a postgraduate student of an affiliated institution which is paying any applicable article publishing charge ("APC") for Open Access articles. Where the Submitting Author wishes to make the Work available on an Open Access basis (and intends to pay the relevant APC), the terms of reuse of such Open Access shall be governed by a Creative Commons licence – details of these licences and which [Creative Commons](#) licence will apply to this Work are set out in our licence referred to above.

Other than as permitted in any relevant BMJ Author's Self Archiving Policies, I confirm this Work has not been accepted for publication elsewhere, is not being considered for publication elsewhere and does not duplicate material already published. I confirm all authors consent to publication of this Work and authorise the granting of this licence.

1 **Title:** Protocol for Project Recovery: Cardiac Surgery – A Single-center Cohort  
2 Study Leveraging Digital Platform to Characterize Longitudinal Patient-Reported  
3 Postoperative Recovery Patterns  
4

5 **Authors:** Makoto Mori MD<sup>1, 2</sup>, Cornell Brooks II BA<sup>1</sup>, Erica Spatz MD MHS<sup>2, 3</sup>,  
6 Bobak J Mortazavi PhD<sup>4</sup>, Sanket S. Dhruva MD MHS<sup>5,6</sup>, George C. Linderman  
7 PhD<sup>1</sup>, Lawrence A. Grab MBA<sup>1</sup>, Yawei Zhang PhD MD<sup>7</sup>, Arnar Geirsson MD<sup>1</sup>,  
8 Sarwat I. Chaudhry MD<sup>8</sup>, Harlan M. Krumholz MD SM<sup>9</sup>  
9

10 **Key word:** Cardiac surgery, postoperative recovery, patient-centered outcome,  
11 longitudinal, latent class

12 **Affiliations:**

13 <sup>1</sup>Section of Cardiac Surgery, Yale School of Medicine, New Haven, Connecticut

14 <sup>2</sup>Center for Outcomes Research and Evaluation, Yale-New Haven Hospital, New  
15 Haven, Connecticut

16 <sup>3</sup>Section of Cardiovascular Medicine, Department of Internal Medicine, Yale  
17 School of Medicine, New Haven, Connecticut

18 <sup>4</sup>Department of Computer Science and Engineering, Texas A&M University,  
19 College Station, Texas

20 <sup>5</sup>Department of Medicine, University of California San Francisco School of  
21 Medicine, San Francisco, California

22 <sup>6</sup>San Francisco VA Medical Center, San Francisco, California

1  
2  
3 23 <sup>7</sup>Department of Environmental Health Sciences, Yale School of Public Health,  
4

5 24 Department of Surgery, Yale School of Medicine, New Haven, Connecticut  
6

7 25 <sup>8</sup>Section of General Internal Medicine, Department of Medicine, Yale School of  
8

9 26 Medicine, New Haven, Connecticut  
10

11 27 <sup>9</sup>Section of Cardiovascular Medicine, Department of Internal Medicine, Yale  
12

13 28 School of Medicine and the Department of Health Policy and Management, Yale  
14

15 29 School of Public Health, New Haven, Connecticut  
16

17 30  
18

19 31 **Corresponding author:**  
20

21 32 Harlan M. Krumholz, MD SM  
22

23 33 Center for Outcomes Research and Evaluation (CORE)  
24

25 34 1 Church Street, Suite 200, New Haven, Connecticut 06510  
26

27 35 Telephone: 203-764-5885; Fax: 203-764-5653  
28

29 36 Email: harlan.krumholz@yale.edu  
30

31 37  
32

33 38  
34  
35  
36  
37  
38  
39  
40  
41  
42  
43  
44  
45  
46  
47  
48  
49  
50  
51  
52  
53  
54  
55  
56  
57  
58  
59  
60

1  
2  
3 39  
4 40 **Abstract** (287/300)  
5

6  
7 41 Introduction  
8

9 42 Improving postoperative patient recovery after cardiac surgery is a priority,  
10  
11 43 but our current understanding of individual variations in recovery and factors  
12  
13 44 associated with poor recovery is limited. We are using a health-information  
14  
15 45 exchange platform to collect patient-reported outcome measures (PROMs) and  
16  
17 46 wearable device data to phenotype recovery patterns in the 30-day period after  
18  
19 47 cardiac surgery hospital discharge, to identify factors associated with these  
20  
21 48 phenotypes and to investigate phenotype associations with clinical outcomes.  
22  
23  
24  
25

26 49

27  
28 50 Methods and analysis  
29

30 51 We designed a prospective cohort study to enroll 200 patients undergoing  
31  
32 52 valve, coronary artery bypass graft, or aortic surgery at a tertiary center in the  
33  
34 53 U.S. We are enrolling patients postoperatively after the intensive care unit (ICU)  
35  
36 54 discharge, and delivering electronic surveys directly to patients every 3 days for  
37  
38 55 30 days after hospital discharge. We will conduct medical record reviews to  
39  
40 56 collect patient demographics, comorbidity, operative details and hospital course  
41  
42 57 using the Society of Thoracic Surgeons (STS) data definitions. We will use phone  
43  
44 58 interview and medical record review data for adjudication of survival,  
45  
46 59 readmission, and complications. We will apply group-based trajectory modeling  
47  
48 60 to the time-series PROM and device data to classify patients into distinct  
49  
50 61 categories of recovery trajectories. We will evaluate whether certain recovery  
51  
52 62 pattern predicts death or hospital readmissions, as well as whether clinical  
53  
54  
55  
56  
57  
58  
59  
60

63 factors predict a patient having poor recovery trajectories. We will evaluate  
64 whether early recovery patterns predict the overall trajectory at the patient-level.

65

66 Ethics and dissemination

67 The Yale Institutional Review Board approved this study. Following the  
68 description of the study procedure, we obtain written informed consent from all  
69 study participants. The consent form states that all personal information, survey  
70 response, and any medical records are confidential, will not be shared, and are  
71 stored in an encrypted database. We plan to publish our study findings in peer-  
72 reviewed journals.

73

#### 74 **Strengths and limitations of this study**

- 75 • This study will assess the patient perspective on recovery after cardiac  
76 surgery at a high frequency within the 30-day postoperative period with  
77 surveys and activity monitoring via a health information platform and  
78 wearable devices.
- 79 • Using longitudinal patient-reported outcomes measure (PROM) data, this  
80 study will define recovery patterns and factors associated with different  
81 recovery trajectories and guide the development interventions to improve  
82 recovery and support expansion of the study to additional sites.
- 83 • The study is single center and the sample size is limited.



1  
2  
3 84 Text (4081 words)  
4

5 85 **Background**  
6

7  
8 86 Improving postoperative patient recovery is a priority. Readmission rates  
9  
10 87 in the post-operative period are high. Moreover, in the United States, the  
11  
12 88 expansion of episode-based payments and performance measures is increasing  
13  
14 89 interest in the post-acute experience of patients<sup>1,2</sup>. However, we generally lack  
15  
16 90 systematically-collected information on the experience of patients in the post-  
17  
18 91 acute period, as few studies rigorously collecting information using established  
19  
20 92 patient-reported outcomes measures (PROMs). We have, for example, little  
21  
22 93 information about the variation of the trajectories of recovery and the factors most  
23  
24 94 strongly associated with better outcomes<sup>3</sup>.  
25  
26  
27

28 95 The assessment of the patient experience can provide important insights  
29  
30 96 into the process of recovery that is not evident through clinical outcomes or  
31  
32 97 intermittent clinical office visits. PROMs and wearable devices can provide  
33  
34 98 complementary information by providing measurements of how the patient's  
35  
36 99 experience and functional status change over time<sup>4</sup>. Current digital platforms  
37  
38 100 allow us to efficiently collect PROMs and wearable-generated data at high  
39  
40 101 frequencies and with little cost and burden. These automated data collection  
41  
42 102 approaches may minimize the bias introduced by clinician-directed patient  
43  
44 103 interviews<sup>5</sup>. Such a platform is highly suited to obtain repeated measures to  
45  
46 104 characterize a time-dependent process such as recovery<sup>6</sup>.  
47  
48  
49  
50

51 105 Cardiac surgery is an ideal area for the study of recovery. Many patients  
52  
53 106 have good outcomes, but the limited existing evidence suggests a wide variation  
54  
55  
56  
57  
58  
59  
60

1  
2  
3 107 in the post-operative experience of these patients<sup>7</sup>. However, these patients'  
4  
5 108 experience has been poorly studied, as most studies of recovery simply assess  
6  
7 109 deaths and complications.  
8  
9

10 110 Characterizing the recovery from the patient perspective is important for  
11  
12 111 many reasons. First, shared decision-making and informed consent should be  
13  
14 112 guided not only by the risk of mortality and complications but also by the recovery  
15  
16 113 experience. Understanding variations in recovery could enable the early  
17  
18 114 identification of people who are struggling and require additional attention.  
19  
20 115 Recovery data from the patient perspective may enable remote monitoring after  
21  
22 116 the procedure to selectively and preemptively intervene on those at high risk of  
23  
24 117 poor recovery to improve outcomes. Characterization of recovery can also be  
25  
26 118 used to identify patient, surgeon, procedural, and institutional factors that are  
27  
28 119 associated with different patterns. With this information we can identify modifiable  
29  
30 120 risk factors for poor recovery.  
31  
32  
33  
34

35 121 Thus, at this juncture, there are several notable gaps in knowledge. First,  
36  
37 122 although recovery occurs over time, most studies of recovery included a small  
38  
39 123 number of timepoints, and the recovery trajectory phenotypes remains poorly  
40  
41 124 defined<sup>3</sup>. Cohort-level average of recovery trajectories is a common way of  
42  
43 125 reporting<sup>3</sup> and can indicate how patients recover on average<sup>7</sup>, but it obscures  
44  
45 126 individual variation such as rapid early recovery, gradual recovery, or initial  
46  
47 127 recovery followed by a decline. Second, we have limited understanding of how  
48  
49 128 recovery trajectories vary by patient factors, operation types, center or surgeon  
50  
51  
52  
53  
54  
55  
56  
57  
58  
59  
60

1  
2  
3 129 characteristics, procedural processes, and complications, which limit  
4  
5 130 opportunities to identify high risk patients preemptively and intervene.  
6

7  
8 131 Accordingly, our overall objective is to characterize short-term trajectories  
9  
10 132 of patient recovery after cardiac surgery using PROMs and wearable data. We  
11  
12 133 are conducting a prospective study to characterize trajectories of postoperative  
13  
14 134 recovery in multiple domains after cardiac surgery. The specific aims of this study  
15  
16 135 are to: 1) leverage a digital data platform to collect PROM and wearable device  
17  
18 136 data to bring forth the variable individual recovery trajectories, 2) describe distinct  
19  
20 137 classes of recovery trajectories and clinical factors associated with the classes,  
21  
22 138 and 3) to evaluate whether early postoperative recovery trajectory predicts later  
23  
24 139 recovery trajectory. In addition, we will investigate optimal ways to manage  
25  
26 140 missing data specific to these time-series data This study is a step toward using  
27  
28 141 this approach to prospectively monitor and preemptively identify patients at risk of  
29  
30 142 poor recovery and facilitate intervention to reduce the risk of adverse events. The  
31  
32 143 purpose of this study protocol summary is to describes a new approach to  
33  
34 144 studying recovery in order to address the knowledge gap as well as to prespecify  
35  
36 145 our approach.  
37  
38  
39  
40  
41  
42  
43

## 44 147 **Methods**

### 46 148 *Design Overview*

47  
48  
49 149 This is a prospective cohort study of patients who are undergoing valve,  
50  
51 150 CABG, or aortic surgery at a tertiary center in the U.S. We chose the operations  
52  
53 151 because they are the most common cardiac operations performed<sup>8</sup> while having  
54  
55  
56  
57  
58  
59  
60

1  
2  
3 152 different patient and operative characteristics, such as the use of deep  
4  
5 153 hypothermic circulatory arrest, to potentially provide insights into the recovery  
6  
7 154 pattern associated with such variations. Subgroup analysis will be conducted to  
8  
9  
10 155 evaluate whether there is a distinct patient experience by operation types. We  
11  
12 156 are enrolling patients postoperatively after ICU discharge in order to ensure  
13  
14 157 clinical stability, and we electronically delivering surveys directly to patients every  
15  
16 158 3 days for 30 days after hospital discharge to study patient trajectories in multiple  
17  
18 159 domains characterizing recovery. The closing phone interview after 30 days,  
19  
20 160 electronic medical record review, and linkage to the Society of Thoracic  
21  
22 161 Surgeons database are used to confirm survival, readmission, and complications.  
23  
24  
25 162 The closing interview asks about details of readmissions if they occurred,  
26  
27 163 patients' overall satisfaction with the study, and whether their experience was  
28  
29 164 well captured by the summary of their PROM data. We will apply group-based  
30  
31 165 trajectory modeling to the longitudinal PROM data to identify distinct categories of  
32  
33 166 recovery trajectories in a data-driven fashion. We also identify predictors of  
34  
35 167 protracted recovery trajectory and evaluate whether early recovery patterns (<10  
36  
37 168 days) predict the overall trajectory (30 days) at the patient-level. The Yale  
38  
39 169 Institutional Review Board approved this study (IRB # 2000025689).  
40  
41  
42  
43  
44  
45  
46

### 47 171 *Patient Population*

48  
49 172 This study began in January 2019 and is ongoing. The study is taking  
50  
51 173 place at Yale-New Haven Hospital, a tertiary center in the United States, where  
52  
53 174 over 1,100 cardiac surgeries are performed annually. Inclusion criteria are  
54  
55  
56  
57  
58  
59  
60

1  
2  
3 175 patients of age 18 and older who are undergoing coronary artery bypass grafting  
4  
5 176 (CABG), valve replacement or repair, or aortic operations. Exclusion criteria are  
6  
7 177 those who undergo heart transplant, extracorporeal membrane oxygenation  
8  
9  
10 178 (ECMO), adult congenital operations, or ventricular assist device implantation, as  
11  
12 179 these patient populations tend to have a longer course of intensive care unit  
13  
14 180 stay<sup>9</sup>, precluding the timely enrollment necessary to capture immediate  
15  
16  
17 181 postoperative recovery. We also excluded those who do not own a smartphone  
18  
19 182 or a tablet or those who do not speak or read English, because the digital  
20  
21 183 platform for PROM data collection relies on patients responding to surveys  
22  
23 184 displayed on web browser via email or text, and the surveys were written in  
24  
25 185 English language. We do not allow proxy for survey response and consequently  
26  
27 186 excluded patients who were not able to respond by themselves as determined by  
28  
29 187 the research assistant.  
30  
31

32  
33 188 In order to provide the sense of patient selection resulting from these  
34  
35 189 criteria, we will compare patient characteristics of those who were approached  
36  
37 190 and were and were not able to participate in the study for any reasons.  
38  
39

40 191

## 41 42 192 *Recruitment*

43  
44 193 Recruitment takes place postoperatively after the patient has left the  
45  
46 194 intensive care unit (ICU) for the step-down or floor unit (Figure 1). We chose to  
47  
48 195 enroll patients postoperatively, as opposed to preoperatively, because  
49  
50 196 postoperative enrollment allows for enrollment of patients who undergo surgery  
51  
52 197 under non-elective settings. Recruitment after transfer from the ICU setting  
53  
54  
55  
56  
57  
58  
59  
60

1  
2  
3 198 ensures clinical stability. A research assistant (RA) visits the patient and after  
4  
5 199 confirming the patient is eligible to participate and following the description of the  
6  
7 200 study procedure, obtains written informed consent (Supplementary Material S1)  
8  
9  
10 201 from all study participants. The informed consent form states that all personal  
11  
12 202 information, survey response, and any medical records are confidential, will not  
13  
14 203 be shared, and will be stored in an encrypted database.  
15

16  
17 204 We iteratively refined the enrollment process to minimize the onboarding  
18  
19 205 time, which includes obtaining informed consent and signup process directed by  
20  
21 206 the RA on a tablet device to enter patient name and email address or phone  
22  
23 207 number and takes approximately 10-15 minutes.  
24  
25

26 208

### 27 28 209 *PROM instrument and administration*

29  
30 210 We use 24-item quality of recovery (QoR-24) to characterize patients'  
31  
32 211 postoperative recovery in various domains. The questionnaire consists of 24  
33  
34 212 items that were developed and validated in inpatient and outpatient surgical  
35  
36 213 populations in terms of convergent validity with visual analogue scale, construct  
37  
38 214 validity compared with length of hospital stay and sex-based difference, along  
39  
40 215 with good internal consistency and test-retest reliability<sup>10-13</sup>. We chose QoR-24  
41  
42 216 among 5 other PROMs developed specifically to measure postoperative  
43  
44 217 recovery. QoR-24 possessed many qualities advantageous for the purpose of our  
45  
46 218 study, including the robust validation of psychometric property, extensive use  
47  
48 219 cases in various surgical populations, ability for self-administration, and the ease  
49  
50 220 of interpreting item-wise scores (Supplementary Table 1-2). The instrument was  
51  
52  
53  
54  
55  
56  
57  
58  
59

1  
2  
3 221 previously adapted into a mobile format and was successfully used to administer  
4  
5  
6 222 the survey daily for 14 days<sup>11, 12</sup>. We added 3 items to QoR-24 to capture the  
7  
8  
9 223 self-reported time patients went to sleep, the time they awakened, and their  
10  
11 224 global perception of how much they have 'recovered' in a 0-100% scale. The  
12  
13 225 resulting 27-item questionnaire takes 2-4 minutes to complete, making its  
14  
15 226 frequent administration feasible (Supplementary Material S2). Among the  
16  
17 227 published studies in cardiac surgery, this study will have the highest number of  
18  
19 228 PROM data points collected in the first postoperative month<sup>3</sup>.  
20  
21  
22  
23  
24

### 25 230 *Digital data platform*

26  
27 231 We are delivering surveys on the day of enrollment and every 3 days for  
28  
29 232 30 days. This method provides detailed longitudinal data across multiple domains  
30  
31 233 of recovery (Figure 2). To facilitate data organization and scheduled survey  
32  
33 234 delivery, we use Hugo (Me2Health, LLC, Guilford CT, USA) a patient-centered  
34  
35 235 health data sharing platform, which has a customizable survey delivery function  
36  
37 236 and reminder feature to facilitate data collection. Hugo platform allows for  
38  
39 237 automated delivery of surveys without researchers having to directly contact  
40  
41 238 patients, which facilitates high-frequency data collection. Additionally, it imports  
42  
43 239 data from connected wearable devices to facilitate centralization of patient health  
44  
45 240 data. The patients retain access to their own data in a cloud-based account.  
46  
47 241 Hugo does not fall under the Covered Entity that Health Insurance Portability and  
48  
49 242 Accountability Act (HIPAA) regulates, but employs all the security measures that  
50  
51 243 would be required by HIPAA had it been a Covered Entity.  
52  
53  
54  
55  
56  
57  
58  
59  
60

244

245 *Identifying common reasons for low response rate*

246           Recognizing that the survey response will be incomplete for some  
247 participants, we have conducted a phone interview with the first 22 patients to  
248 learn reasons for low responses and identify strategies to minimize the barriers  
249 toward survey response for subsequent participants. In the first 22 patients, we  
250 identified 5 with response rate of <50% and conducted recorded phone  
251 interviews. Our interview guide (Supplementary Material S3) contained questions  
252 to elucidate technical barriers, differential preferences for engagement, and or  
253 any other issues precluding survey completion. We also asked whether the  
254 length of the questionnaire or types of questions asked made it difficult to  
255 complete the survey. Two members of the research team (CB and MM)  
256 evaluated the interview recordings to identify common reasons for low response  
257 rate. This suggested the potential importance of reminder to maintain patient  
258 engagement. We modified the protocol to contact all participants approximately  
259 10 days after enrollment. We will continue to conduct this phone interview for  
260 patients with low response rate and describe engagement and barriers to  
261 participation in the final cohort. Survey response rate and time spent to complete  
262 each survey will be reported descriptively to evaluate the degree of patient  
263 engagement. This approach likely allows us to identify patients who either did not  
264 respond or completed the survey in an unrealistically short time that may not  
265 represent a meaningful response.

266



1  
2  
3 267 *Additional clinical data and adjudication of hospitalization and survival*  
4

5 268         Additionally, we are using the Society of Thoracic Surgeons (STS) Adult  
6  
7 269 Cardiac Surgery Database data specifications to retrospectively collect clinically  
8  
9 270 relevant data in this patient population. Pre-specified candidate predictors in this  
10  
11 271 database will be used to identify clinical predictors of recovery trajectories (Table  
12  
13 272 1). The STS database contains patient demographics, comorbidities, presenting  
14  
15 273 clinical status, operative details, and postoperative mortality and morbidity up to  
16  
17 274 30 days after the time of operation<sup>14</sup>. These data are routinely collected at Yale  
18  
19 275 New Haven Hospital. At our program, 30-day mortality rates for isolated aortic  
20  
21 276 valve replacement and isolated CABG are stable around 1%, with 30-day  
22  
23 277 readmission rate of about 10%, which are slightly lower than the national  
24  
25 278 average.  
26  
27  
28  
29

30  
31 279         We will determine mortality and hospital readmissions by several  
32  
33 280 approaches: review of hospital records, review of cardiac surgery clinic notes,  
34  
35 281 and conducting closing phone interviews with the patient or contact person  
36  
37 282 previously identified.  
38  
39

40 283

41  
42 284 *Patient Involvement*  
43

44 285         Prior to launching the study, we interviewed 5 patients both in pre and  
45  
46 286 postoperative settings to evaluate whether the frequency of survey delivery and  
47  
48 287 PROM instrument were likely to adequately capture their experience of recovery.  
49  
50 288 All patients agreed that the frequency of questionnaire administration and the  
51  
52 289 length of the PROM instrument were reasonable and provided face validity that  
53  
54  
55  
56  
57  
58  
59  
60

1  
2  
3 290 the questionnaire captured aspects of recovery that were important to the  
4  
5 291 patients. Additionally, this article is authored with a patient (LG) who participated  
6  
7 292 in the study to reflect his perspective on the study design and experience in  
8  
9  
10 293 responding to the surveys.

11  
12 294

13  
14 295 *Sample size*

15  
16  
17 296 The study sample target is 200 patients. Adequate sample size for studies  
18  
19 297 using group-based trajectory modeling depends on the dataset's  
20  
21 298 representativeness of the population of interest<sup>15</sup>. Therefore, the concept of  
22  
23 299 statistical power traditionally used for sample size calculation does not apply to  
24  
25 300 latent class analyses. We may generate a larger simulation dataset from the  
26  
27 301 measured patient trajectory data to perform a split-sample testing, evaluating  
28  
29 302 whether trajectories generated from the derivation sample would allow for  
30  
31 303 satisfactory categorization of the testing dataset. Additionally, the study setting is  
32  
33 304 scalable to increase the sample size by increasing the enrollment period, should  
34  
35 305 a larger sample size become necessary.

36  
37 306

38  
39  
40  
41  
42 307 *Analytical approach – group-based trajectory modeling*

43  
44  
45  
46 308 The resulting dataset is a complex time-series data, with each patient  
47  
48  
49 309 having 10 data points (one every three days) at different postoperative times for  
50  
51  
52 310 each item. A practical approach to dimension reduction is group-based trajectory

1  
2  
3 311 modeling, which is a type of latent class analysis that groups similar patient  
4  
5  
6  
7 312 trajectories according to a number of features derived from the time-series data<sup>16</sup>,  
8  
9  
10 313 <sup>17</sup>. This approach allows for dimension reduction of the complex time-series data  
11  
12  
13  
14 314 into several distinct classes of recovery trajectories. These trajectories can be  
15  
16  
17 315 labeled according to the observed clinical phenotype of trajectories, for example  
18  
19  
20  
21 316 'fast recovery,' 'average recovery,' or 'protracted recovery,'. This data-driven  
22  
23  
24 317 categorization enables additional regression modeling to identify predictors of  
25  
26  
27  
28 318 patients belonging to a certain class of recovery path.

31 319 The dataset will be classified into distinct categories of trajectories at  
32  
33  
34  
35 320 domain level, using group-based trajectory modeling<sup>16, 17</sup>. Traj package on R<sup>18</sup> or  
36  
37  
38 321 Proc Traj package on SAS<sup>15</sup>, performs trajectory modeling by first extracting 24  
39  
40  
41  
42 322 features of patient-level trajectory, selecting a subset of features that describes  
43  
44  
45 323 the overall trajectory, and identifying optimal number of classes to group the  
46  
47  
48  
49 324 trajectories based on the longitudinal k-means method. The 24 features include  
50  
51  
52 325 range, mean change per unit time, and slope of the linear model (Table 2), which  
53  
54  
55  
56 326 have been demonstrated to discriminate between stable-unstable, increasing-

1  
2  
3 327 decreasing, linear-nonlinear, and monotonic-nonmonotonic patterns of  
4  
5  
6  
7 328 trajectories<sup>18</sup>. K-means method partitions the time-series data into k groups such  
8  
9  
10 329 that the mean squared error distance of each data point from the assigned  
11  
12  
13  
14 330 cluster is minimized<sup>19</sup>. The optimal number of clusters is determined by the  
15  
16  
17 331 minimization of Bayesian information criterion, which signifies the balance  
18  
19  
20  
21 332 between model's complexity and the ability to describe the dataset. This process  
22  
23  
24 333 yields distinct classes of patient trajectories in a data-driven fashion. Trajectories  
25  
26  
27  
28 334 will be identified separately for the 5 domains and 1 global recovery measure.

31 335 With the characterization of trajectories, we will then fit multinomial logistic  
32  
33 336 regression models using clinical variables outlined in Table 1, including patient  
34  
35 337 demographics, comorbidity, and postoperative event such as complications and  
36  
37  
38 338 ICU readmissions, to identify predictors of patients belonging to each trajectory  
39  
40 339 class. As some variables interact with each other, such as history of chronic lung  
41  
42 340 disease increasing the risk of postoperative pneumonia, which likely impacts the  
43  
44  
45 341 recovery experience, we plan to stratify the cohort with and without the index  
46  
47 342 complications defined by the STS (prolonged ventilation, renal failure, sternal  
48  
49 343 wound infection, pneumonia, stroke, all-cause reoperation). Further analyses on  
50  
51 344 interaction and mediation effects likely requires a larger sample size and are of  
52  
53  
54 345 interest in the future.

1  
2  
3 346  
4

5 347 *Analytical approach – missing data*  
6

7 348 Because missing data are inevitable in longitudinal PROMs, there is a  
8  
9  
10 349 need employ an appropriate handling of missing data. Multiple imputation prior to  
11  
12 350 latent class analysis may yield a less biased estimate of the resulting trajectories.  
13  
14 351 An alternative approach used in group-based trajectory models assumes the data  
15  
16 352 are missing at random (MAR) and generates the maximum likelihood of the  
17  
18 353 model parameters<sup>20</sup>. MAR is valid when the response attrition is independent of  
19  
20 354 the group membership. However, patient attrition is oftentimes dependent on  
21  
22 355 clinical characteristics and likely related to the class of trajectory itself. An  
23  
24 356 extension of the model allows for modeling of attrition across trajectory groups<sup>21</sup>,  
25  
26 357 permitting dropout probability to vary as a function of covariates or observed  
27  
28 358 outcomes prior to dropout and yields a more robust estimate of the probability of  
29  
30 359 group membership. As such, we will perform sensitivity analysis to compare the  
31  
32 360 trajectories generated via raw data vs. data preprocessed with multiple  
33  
34 361 imputation vs. trajectories generated via trajectory model accounting for response  
35  
36 362 attrition.  
37  
38  
39  
40  
41  
42  
43

44 363

45 364 **Results**

46  
47 365 Between January and May 2019, we have enrolled 22 patients who  
48  
49 366 completed the 30-day follow-up. In this cohort, median age was 58.5 years  
50  
51 367 (interquartile range 53.5-67.0) and 7 (32%) were women. There were 9 (41%)  
52  
53 368 mitral valve repair cases and 6 isolated or concomitant CABG (27%).  
54  
55  
56  
57  
58  
59  
60

1  
2  
3 3694  
5 370 *Barriers to completing surveys*

6  
7 371 Of the 22 patients enrolled, 3 (14%) did not complete any surveys, 19  
8 372 (86%) completed at least 3 surveys, and 17 patients (77%) completed at least 6  
9  
10 373 of 11 delivered surveys (>50% of delivered surveys). Of the 5 patients who  
11  
12 374 completed less than half of the surveys, we successfully contacted 4, and 1 could  
13  
14 375 not be reached after 5 attempts. All 4 reported that the major barriers precluding  
15  
16 376 survey completion were their clinical conditions: 2 described readmissions as an  
17  
18 377 overwhelming event that made them feel continuing survey participation  
19  
20 378 challenging, and 2 described not feeling well in general, which precluded  
21  
22 379 participation. All 4 patients noted that text or email reminders might have been  
23  
24 380 helpful to sustain participation. Based on these responses, we modified the  
25  
26 381 protocol to contact all participants approximately 10 days after enrollment to  
27  
28 382 improve engagement and resolve any patient-specific issues in completing the  
29  
30 383 surveys.

31  
32 38433  
34 385 *Clinical outcomes*

35  
36 386 There were no deaths during follow-up. Two (9%) patients experienced at  
37  
38 387 least 1 hospital readmission. Figure 2 depicts the breadth in recovery trajectories  
39  
40 388 in pain, sleep, ability to take care of own hygiene, and perception of overall  
41  
42 389 recovery in five patients with complete response.

43  
44 39045  
46 391 **Discussion**

1  
2  
3 392 This study will provide time-series data on short-term recovery after  
4  
5 393 cardiac surgery using PROM instruments complemented by clinical records  
6  
7 394 obtained via the STS database and electronic health records. This study will  
8  
9  
10 395 provide one of the highest density of postoperative PROM data in existing  
11  
12 396 cardiac surgery literature<sup>3</sup>, and it will characterize the variability in individual  
13  
14 397 recovery processes with a high temporal resolution. This study will be important  
15  
16 398 in closing knowledge gaps around patient-level variations in trajectories because  
17  
18 399 prior studies have mostly focused on changes in PROM scores at a limited  
19  
20 400 number of time points<sup>3</sup> or reporting group-level aggregate of longitudinal recovery  
21  
22 401 data<sup>7, 22</sup>. Because recovery is an individual, variable, and time-dependent  
23  
24 402 process, we designed our data collection and analytical approach to capture such  
25  
26 403 features important to recovery.

27  
28  
29  
30 404 This study has the potential to make a variety of contributions toward  
31  
32 405 improving post-acute phase of care. First, we will be able to develop a  
33  
34 406 preliminary nomogram of postoperative recovery for each domain and overall  
35  
36 407 perception of recovery, which would be instrumental for patients and clinicians to  
37  
38 408 gauge the breadth of possible recovery trajectories to facilitate informed shared  
39  
40 409 decision-making. Second, identifying predictors of accelerated or protracted  
41  
42 410 recovery, as classified by group-based trajectory model, may allow for  
43  
44 411 individualized prediction of the postoperative recovery course to better inform the  
45  
46 412 patients and family members. Third, early detection of recovery signals related to  
47  
48 413 adverse events, such as mortality and readmission, may eventually facilitate  
49  
50 414 preemptive intervention and focused monitoring of patients at an elevated risk for  
51  
52  
53  
54  
55  
56  
57  
58  
59  
60

1  
2  
3 415 such events. Our design of the longitudinal PROM data collection allows for  
4  
5 416 incremental update of such prediction as patients progress through the phase of  
6  
7 417 recovery.

8  
9  
10 418 There are many challenges to the successful acquisition of patient  
11  
12 419 measurements during recovery: efficient administration of PROMs in a way that  
13  
14 420 does not require prohibitive amount of resources, minimizing selection bias  
15  
16 421 originating from barriers to survey completion, handling of missing data that  
17  
18 422 inevitably occurs in PROMs, and summarizing the complex data in a way that is  
19  
20 423 interpretable to surgeons and patients<sup>23</sup>. Additionally, the use of wearables and  
21  
22 424 device data require active patient participation in periodically charging the device,  
23  
24 425 wearing them correctly, and reliably syncing the device to the server for data  
25  
26 426 uploads. Moreover, there is a need to provide value to the patients for providing  
27  
28 427 their recovery profile, such as giving them access to their health data in a  
29  
30 428 meaningful way.

31  
32  
33 429 The resulting data collection, analytical, and output platforms have the  
34  
35 430 potential of being implemented in the clinical setting where an integration of  
36  
37 431 incrementally increasing PROM and clinical data provides the near-real time  
38  
39 432 estimate of individual patient risk of adverse post-operative events. Such a model  
40  
41 433 may allow for triggering of preemptive clinical intervention. An output may  
42  
43 434 assimilate a form of clinical dashboard within the electronic health record system,  
44  
45 435 which may be monitored at a centralized location where a trained clinician  
46  
47 436 reviews high-risk cases filtered by the algorithm to further evaluate whether the  
48  
49  
50  
51  
52  
53  
54  
55  
56  
57  
58  
59  
60



1  
2  
3 437 patient condition warrants an intervention. Together, this workflow has a  
4  
5 438 tremendous potential to improve post-acute phase of care following surgery.  
6  
7

8 439

9  
10 440 *Lessons Learned from the initial experience*

11  
12 441 Through this first group of enrolled patients, we learned that most of the  
13  
14 442 patients approached were willing to participate and consented to the study. By  
15  
16 443 streamlining the enrollment process, the enrollment time shortened from over 1  
17  
18 444 hour on the first patient to approximately 10-15 minutes for the current  
19  
20 445 enrollment. The overall response rate is acceptable, with 77% of the participants  
21  
22 446 completing more than half of the delivered surveys independently without any  
23  
24 447 intervention by researchers. Challenging recovery course, including readmissions  
25  
26 448 may have interfered with patient engagement. While this would have resulted in  
27  
28 449 an underrepresentation of those with protracted recovery or with complications,  
29  
30 450 our preliminary data show we were able to capture variations in the trajectories of  
31  
32 451 recovery.  
33  
34  
35  
36  
37

38 452 To sustain patient engagement through challenging recovery course, we  
39  
40 453 implemented a protocol for a research assistant to call the patient around 10  
41  
42 454 days after enrollment to troubleshoot any issues and reemphasize the  
43  
44 455 importance of their participation. By the protocol, research assistant making this  
45  
46 456 call does not act in clinical capacity and does not provide clinical evaluation or  
47  
48 457 advise, which is an important boundary for this call to not act as an intervention to  
49  
50 458 alter recovery course. We believe that once the survey becomes part of clinical  
51  
52  
53  
54  
55  
56  
57  
58  
59  
60

1  
2  
3 459 workflow with clinicians monitoring and responding to the PROM response,  
4  
5 460 patient response rate would improve further.  
6

7 461 We modified the enrollment protocol to reduce the enrollment time,  
8  
9 462 because to some patients, the complexity and prolonged time spent for  
10  
11 463 enrollment discouraged signups. Initial protocol for enrollment required patients  
12  
13 464 to download an app and register. This resulted in a wide range of time spent for  
14  
15 465 enrollment between 15 minutes and 90 minutes, with longer enrollment owing to  
16  
17 466 technical challenges. These challenges include patients forgetting the password  
18  
19 467 for app download, having to reset the password, and not having immediate email  
20  
21 468 access to check account confirmation emails. Because our cardiac surgery  
22  
23 469 patient population tended to be older, these technical challenges may have been  
24  
25 470 pronounced. By not including the app download and allowing for the research  
26  
27 471 assistant to enroll the patient via an online form with their permission, the  
28  
29 472 enrollment time shortened significantly to 10-15 minutes.  
30  
31  
32  
33  
34

35 473 Examining the initial individual data on recovery, there were wide  
36  
37 474 variations in the trajectories of recovery even among only 5 patients. The  
38  
39 475 variation suggests that the instrument we used was sensitive to capturing such  
40  
41 476 differences. We also noted variations in improvement over time across different  
42  
43 477 domains of recovery, where overall perception of recovery seemed to have a  
44  
45 478 steady improvement pattern, while pain varied between consecutive  
46  
47 479 measurements in some patients.  
48  
49  
50

51 480

52  
53 481 *Limitations*  
54  
55  
56  
57  
58  
59  
60

1  
2  
3 482           There are several limitations to this study. First, the single-center tertiary  
4  
5 483   care setting limits the sample size and applicability of the findings to patients  
6  
7 484   cared for in different settings. A multi-center study following the current study  
8  
9 485   would address this limitation and evaluate whether the findings at our center are  
10  
11 486   comparable to findings in other centers. Additionally, group-based trajectory  
12  
13 487   modeling will classify patients into distinct trajectories based on similar recovery  
14  
15 488   patterns, and this analytical approach may allow for generalization of the  
16  
17 489   variations in the trajectories as long as our sample represents the breadth of the  
18  
19 490   possible variation in recovery.

20  
21  
22  
23  
24 491           Another limitation is the exclusion of patients who cannot participate for  
25  
26 492   various reasons. The use of digital platform is advantageous in reducing the  
27  
28 493   resource intensity for data collection, but leads to exclusion of patients who do  
29  
30 494   not own mobile devices, which likely affects older patients disproportionately. As  
31  
32 495   the number of adults using mobile devices is increasing<sup>24</sup>, we believe this will  
33  
34 496   become less of a limitation over time. Initiating this study now despite this  
35  
36 497   limitation is important to establish a platform that may become the standard of  
37  
38 498   postoperative care when the vast majority of patient population own digital  
39  
40 499   devices in a predictably near future. Those who cannot participate due to lack of  
41  
42 500   interest or technological barrier represent an important population that may be  
43  
44 501   distinct in characteristics and risk profiles. While acknowledging the selection  
45  
46 502   bias originating from this inclusion threshold, we believe there is a need to initiate  
47  
48 503   collection of patient-centered outcome measures in the proposed approach, in  
49  
50 504   order to further engage hospitals and programs for a broader implementation of  
51  
52  
53  
54  
55  
56  
57  
58  
59  
60

1  
2  
3 505 this approach in the context of extremely limited evidence base. We plan on  
4  
5 506 minimizing the non-participation for the lack of interest by intermittent phone  
6  
7 507 check-ins to sustain interests and identify barriers to inform strategies to increase  
8  
9 508 engagement. While recognizing that clinical implementation of this protocol would  
10  
11 509 preclude the use of incentives, in following studies, we may consider other forms  
12  
13 510 of incentives to participate, if this population is indeed distinct and large in  
14  
15 511 proportion. Additionally, when the PROM data are integrated into routine clinical  
16  
17 512 care, patient engagement will likely increase substantially because they will be  
18  
19 513 more inspired to share these data if they are used by their clinicians.  
20  
21  
22  
23

24 514 Finally, postoperative enrollment and retrospective assessment of  
25  
26 515 preoperative health status, as opposed to preoperative enrollment, may introduce  
27  
28 516 recall bias. We decided on postoperative enrollment, because preoperative  
29  
30 517 enrollment precluded standardized enrollment of patients operated on under non-  
31  
32 518 elective settings. Given the retrospective assessment of baseline health status  
33  
34 519 takes place on the first postoperative survey, we believe the recall bias is  
35  
36 520 minimized owing to the temporal proximity.  
37  
38  
39

40 521

## 41 42 522 **Conclusion**

43  
44 523 This study will generate highly granular, longitudinal PROM data to  
45  
46 524 characterize individual trajectories of patient recovery after cardiac surgery.  
47  
48 525 Digital data sharing platforms promise to minimize the patient and researcher  
49  
50 526 burden in administering and completing PROMs, allowing for characterization of  
51  
52 527 granular progression of patients' state of health over time in the postoperative  
53  
54  
55  
56  
57  
58  
59  
60

1  
2  
3 528 period. Implementation of such study is complex but feasible, and it will serve as  
4  
5 529 an important platform to facilitate clinical use of PROM data to improve the  
6  
7 530 overall patient recovery.  
8  
9

10 531

### 11 532 **Authors contributions**

12  
13  
14 533 MM, HMK, SD, and AG developed the study and research question. MM and  
15  
16 534 HMK developed analytical strategy with inputs from BJM, GCL, and YZ. SIC, CB,  
17  
18 535 and ES guided refining the enrollment strategy and interpretation of the phone  
19  
20 536 interview responses. LAG provided patient perspective on the study protocol and  
21  
22 537 interpretation of the preliminary results. All authors developed and approved the  
23  
24 538 final manuscript before submission.  
25  
26  
27

28 539

### 29 540 **Funding statement**

30  
31  
32  
33 541 This publication was made possible by K12HL138046 by the National Institutes  
34  
35 542 of Health (NIH) and the Yale Clinical and Translational Science Award, grant  
36  
37 543 UL1TR001863, from the National Center for Advancing Translational Science, a  
38  
39 544 component of the NIH.  
40  
41

42 545

### 43 546 **Competing interest statement**

44  
45  
46  
47 547 Dr. Chaudhry is a paid reviewer for the CVS Caremark State of CT Clinical  
48  
49 548 Pharmacy Program.

50  
51 549 Dr. Mortazavi is supported in part by the Center for Remote Health Technologies  
52  
53 550 and Systems and Texas A&M University, as well as awards 1R01EB028106-01  
54  
55  
56  
57  
58  
59

1  
2  
3 551 and 1R21EB028486-01 from the National Institute for Biomedical Imaging and  
4  
5 552 Bioengineering (NIBIB) for work employing machine learning on health data. Dr.  
6  
7 553 Mortazavi reported having a patent US10201746B1 approved for "Near-realistic  
8  
9 554 sports motion analysis and activity monitoring" and a patent to  
10  
11 555 US20180315507A1 is pending.  
12  
13  
14 556 Dr. Krumholz works under contract with the Centers for Medicare & Medicaid  
15  
16 557 Services to support quality measurement programs; was a recipient of a research  
17  
18 558 grant, through Yale, from Medtronic and the U.S. Food and Drug Administration  
19  
20 559 to develop methods for post-market surveillance of medical devices; was a  
21  
22 560 recipient of a research grant with Medtronic and is the recipient of a research  
23  
24 561 grant from Johnson & Johnson, through Yale University, to support clinical trial  
25  
26 562 data sharing; was a recipient of a research agreement, through Yale University,  
27  
28 563 from the Shenzhen Center for Health Information for work to advance intelligent  
29  
30 564 disease prevention and health promotion; collaborates with the National Center  
31  
32 565 for Cardiovascular Diseases in Beijing; receives payment from the Arnold &  
33  
34 566 Porter Law Firm for work related to the Sanofi clopidogrel litigation, from the Ben  
35  
36 567 C. Martin Law Firm for work related to the Cook Celect IVC filter litigation, and  
37  
38 568 from the Siegfried and Jensen Law Firm for work related to Vioxx litigation; chairs  
39  
40 569 a Cardiac Scientific Advisory Board for UnitedHealth; was a  
41  
42 570 participant/participant representative of the IBM Watson Health Life Sciences  
43  
44 571 Board; is a member of the Advisory Board for Element Science, the Advisory  
45  
46 572 Board for Facebook, and the Physician Advisory Board for Aetna; and is the co-  
47  
48 573 founder of HugoHealth, a personal health information platform, and co-founder of  
49  
50  
51  
52  
53  
54  
55  
56  
57  
58  
59  
60

1  
2  
3 574 Refactor Health, an enterprise healthcare AI-augmented data management  
4  
5 575 company.

6  
7  
8 576

9  
10 577

11  
12 578 **References**

- 13  
14  
15 579 1. Wadhera RK, Yeh RW and Joynt Maddox KE. The Rise and Fall of  
16 580 Mandatory Cardiac Bundled Payments. *JAMA*. 2018;319:335-336.  
17 581 2. Khera R, Dharmarajan K, Wang Y, Lin Z, Bernheim SM, Normand ST and  
18 582 Krumholz HM. Association of the Hospital Readmissions Reduction Program  
19 583 With Mortality During and After Hospitalization for Acute Myocardial Infarction,  
20 584 Heart Failure, and Pneumonia. *JAMA Netw Open*. 2018;1:e182777.  
21 585 3. Mori M, Angraal S, Chaudhry SI, Suter LG, Geirsson A, Wallach JD and  
22 586 Krumholz HM. Characterizing Patient-Centered Postoperative Recovery After  
23 587 Adult Cardiac Surgery: A Systematic Review. *J Am Heart Assoc*.  
24 588 2019;8:e013546.  
25 589 4. Gill TM, Gahbauer EA, Han L and Allore HG. Trajectories of disability in  
26 590 the last year of life. *N Engl J Med*. 2010;362:1173-80.  
27 591 5. Pakhomov SV, Jacobsen SJ, Chute CG and Roger VL. Agreement  
28 592 between patient-reported symptoms and their documentation in the medical  
29 593 record. *Am J Manag Care*. 2008;14:530-9.  
30 594 6. Moore FD. Getting well: the biology of surgical convalescence. *Ann N Y*  
31 595 *Acad Sci*. 1958;73:387-400.  
32 596 7. Diab MS, Bilkhu R, Soppa G, Edsell M, Fletcher N, Heiberg J, Royse C  
33 597 and Jahangiri M. The influence of prolonged intensive care stay on quality of life,  
34 598 recovery, and clinical outcomes following cardiac surgery: A prospective cohort  
35 599 study. *J Thorac Cardiovasc Surg*. 2018;156:1906-1915.e3.  
36 600 8. Thourani VH, Badhwar V, Shahian DM, O'Brien S, Kitahara H, Vemulapalli  
37 601 S, Brennan JM, Habib RH, Fernandez F, D'Agostino RS, Lobdell K, Rankin JS,  
38 602 Gammie JS, Higgins R, Sabik J, Schwann TA and Jacobs JP. The Society of  
39 603 Thoracic Surgeons Adult Cardiac Surgery Database: 2019 Update on Research.  
40 604 *Ann Thorac Surg*. 2019;108:334-342.  
41 605 9. Blanche C, Blanche DA, Kearney B, Sandhu M, Czer LS, Kamlot A,  
42 606 Hickey A and Trento A. Heart transplantation in patients seventy years of age  
43 607 and older: A comparative analysis of outcome. *J Thorac Cardiovasc Surg*.  
44 608 2001;121:532-41.  
45 609 10. Dahlberg K, Jaensson M, Eriksson M and Nilsson U. Evaluation of the  
46 610 Swedish Web-Version of Quality of Recovery (SwQoR): Secondary Step in the  
47 611 Development of a Mobile Phone App to Measure Postoperative Recovery. *JMIR*  
48 612 *research protocols*. 2016;5:e192.

- 613 11. Jaensson M, Dahlberg K, Eriksson M and Nilsson U. Evaluation of  
614 postoperative recovery in day surgery patients using a mobile phone application:  
615 a multicentre randomized trial. *Br J Anaesth*. 2017;119:1030-1038.
- 616 12. Halleberg Nyman M, Nilsson U, Dahlberg K and Jaensson M. Association  
617 Between Functional Health Literacy and Postoperative Recovery, Health Care  
618 Contacts, and Health-Related Quality of Life Among Patients Undergoing Day  
619 Surgery: Secondary Analysis of a Randomized Clinical Trial. *JAMA Surg*.  
620 2018;153:738-745.
- 621 13. Myles PS, Weitkamp B, Jones K, Melick J and Hensen S. Validity and  
622 reliability of a postoperative quality of recovery score: the QoR-40. *Br J Anaesth*.  
623 2000;84:11-5.
- 624 14. O'Brien SM, Feng L, He X, Xian Y, Jacobs JP, Badhwar V, Kurlansky PA,  
625 Furnary AP, Cleveland JC, Lobdell KW, Vassileva C, Wyler von Ballmoos MC,  
626 Thourani VH, Rankin JS, Edgerton JR, D'Agostino RS, Desai ND, Edwards FH  
627 and Shahian DM. The Society of Thoracic Surgeons 2018 Adult Cardiac Surgery  
628 Risk Models: Part 2-Statistical Methods and Results. *Ann Thorac Surg*.  
629 2018;105:1419-1428.
- 630 15. Loughran T and Nagin DS. Finite Sample Effects in Group-Based  
631 Trajectory Models. *Sociological Methods & Research*. 2006;35:250-278.
- 632 16. Nagin DS and Odgers CL. Group-based trajectory modeling in clinical  
633 research. *Annu Rev Clin Psychol*. 2010;6:109-38.
- 634 17. Savage SA, Sumislawski JJ, Bell TM and Zarzaur BL. Utilizing Group-  
635 based Trajectory Modeling to Understand Patterns of Hemorrhage and  
636 Resuscitation. *Ann Surg*. 2016;264:1135-1141.
- 637 18. Leffondré K, Abrahamowicz M, Regeasse A, Hawker GA, Badley EM,  
638 McCusker J and Belzile E. Statistical measures were proposed for identifying  
639 longitudinal patterns of change in quantitative health indicators. *J Clin Epidemiol*.  
640 2004;57:1049-62.
- 641 19. Hartigan JA and Wong MA. Algorithm AS 136: A K-Means Clustering  
642 Algorithm. *Applied Statistics*. 1979;28:100--108.
- 643 20. Jones BL, Nagin DS and Roeder K. A SAS Procedure Based on Mixture  
644 Models for Estimating Developmental Trajectories. *Sociological Methods &*  
645 *Research*. 2001;29:374-393.
- 646 21. Haviland AM, Jones BL and Nagin DS. Group-based Trajectory Modeling  
647 Extended to Account for Nonrandom Participant Attrition. *Sociological Methods &*  
648 *Research*. 2011;40:367-390.
- 649 22. Petersen J, Vettorazzi E, Winter L, Schmied W, Kindermann I and  
650 Schäfers HJ. Physical and mental recovery after conventional aortic valve  
651 surgery. *J Thorac Cardiovasc Surg*. 2016;152:1549-1556.e2.
- 652 23. Calvert M, Kyte D, Price G, Valderas JM and Hjollund NH. Maximising the  
653 impact of patient reported outcome assessment for patients and society. *BMJ*.  
654 2019;364:k5267.
- 655 24. Anderson M, Perrin A. Tech Adoption Climbs Among Older Adults.  
656 [https://www.pewinternet.org/wp-](https://www.pewinternet.org/wp-content/uploads/sites/9/2017/05/PI_2017.05.17_Older-Americans-Tech_FINAL.pdf)  
657 [content/uploads/sites/9/2017/05/PI\\_2017.05.17\\_Older-Americans-](https://www.pewinternet.org/wp-content/uploads/sites/9/2017/05/PI_2017.05.17_Older-Americans-Tech_FINAL.pdf)  
658 [Tech\\_FINAL.pdf](https://www.pewinternet.org/wp-content/uploads/sites/9/2017/05/PI_2017.05.17_Older-Americans-Tech_FINAL.pdf). Published 2017. Accessed March 30, 2019.



1  
2  
3 659

4 660

6 661

9 662

10  
11  
12  
13  
14  
15  
16  
17  
18  
19  
20  
21  
22  
23  
24  
25  
26  
27  
28  
29  
30  
31  
32  
33  
34  
35  
36  
37  
38  
39  
40  
41  
42  
43  
44  
45  
46  
47  
48  
49  
50  
51  
52  
53  
54  
55  
56  
57  
58  
59  
60

For peer review only

663 **Tables and Figures**

664 Table 1: Candidate predictors of recovery trajectory

| <b>Demographic</b> | <b>Comorbidity</b>                 | <b>Operative factors</b>    | <b>Postoperative factors</b> |
|--------------------|------------------------------------|-----------------------------|------------------------------|
| Age                | Diabetes                           | Cardiopulmonary bypass time | Length of ICU stay           |
| Sex                | Prior stroke                       | Cross clamp time            | Length of hospital stay      |
| Race               | Congestive heart failure           | Operation type              | Surgical site infection      |
| Insurance status   | Chronic kidney disease             | Non-elective status         | Prolonged ventilation        |
| BMI                | Dialysis                           | Transfusion requirement     | Transfusion requirement      |
|                    | Prior MI                           | Minimally invasive approach | Stroke                       |
|                    | Prior cardiac surgery              |                             | Reoperation for any reasons  |
|                    | Ejection fraction                  |                             | Death                        |
|                    | Arrhythmias                        |                             | Readmission                  |
|                    | Prior PCI                          |                             | Pneumonia                    |
|                    | Cardiogenic shock                  |                             |                              |
|                    | Hypertension                       |                             |                              |
|                    | Dyslipidemia                       |                             |                              |
|                    | Smoking status                     |                             |                              |
|                    | Chronic lung disease               |                             |                              |
|                    | Endocarditis                       |                             |                              |
|                    | Pneumonia                          |                             |                              |
|                    | Peripheral artery disease          |                             |                              |
|                    | Immunocompromised                  |                             |                              |
|                    | Mechanical circulatory support use |                             |                              |
|                    | Valvular disease severity          |                             |                              |

665

666

667 Table 2: 24 features of trajectory used in group-based trajectory model

| N  | Features                                                                           |
|----|------------------------------------------------------------------------------------|
| 1  | Range                                                                              |
| 2  | Mean-over-time                                                                     |
| 3  | Standard deviation (SD)                                                            |
| 4  | Coefficient of variation (CV)                                                      |
| 5  | Change                                                                             |
| 6  | Mean change per unit time                                                          |
| 7  | Change relative to the first score                                                 |
| 8  | Change relative to the mean over time                                              |
| 9  | Slope of the linear model                                                          |
| 10 | Proportion of variance explained by the linear model                               |
| 11 | Maximum of the first differences                                                   |
| 12 | SD of the first differences                                                        |
| 13 | SD of the first differences per time unit                                          |
| 14 | Mean of the absolute first differences                                             |
| 15 | Maximum of the absolute first differences                                          |
| 16 | Ratio of the maximum absolute difference to the mean-over-time                     |
| 17 | Ratio of the maximum absolute first difference to the slope                        |
| 18 | Ratio of the SD of the first differences to the slope                              |
| 19 | Mean of the second differences                                                     |
| 20 | Mean of the absolute second differences                                            |
| 21 | Maximum of the absolute second differences                                         |
| 22 | Ration of the maximum absolute second difference to the mean-over-time             |
| 23 | Ratio of the maximum absolute second difference to mean absolute first difference  |
| 24 | Ratio of the mean absolute second difference to the mean absolute first difference |

668

669

1  
2  
3 670 Figure 1: Timing of patient enrollment and PROM administration  
4

5 671  
6

7 672  
8

9  
10 673 The figure shows the timing of patient enrollment and PROM administration over  
11

12 674 the clinical course. Baseline function is assessed by retrospectively asking the  
13

14 675 patient about their state of health during 1 month prior to the operation. 24-item  
15

16 676 Quality of Recovery questionnaire is administered every 3 days for 30 days  
17

18 677 following discharge from the intensive care unit.  
19

20 678  
21

22 679  
23

24 680 Figure 2: Sample trajectories of recovery in 5 patients  
25

26 681  
27

28 682  
29

30 683 The figures display trajectories of recovery in different domains in 5 patients.  
31

32 684 Each color corresponds to the same patient. Overall recovery is the patient's  
33

34 685 perception of overall recovery in 0 to 100% scale. Pain in surgical site is reported  
35

36 686 in 0 to 10 point scale, with 10 representing the worst pain. Being able to take care  
37

38 687 of own hygiene is reported in 0 to 10 point scale, with 10 representing complete  
39

40 688 independence in managing own hygiene. Patient's perception of sleep quality is  
41

42 689 reported in 0 to 10 point scale, with 10 being the best sleep.  
43  
44  
45  
46  
47  
48  
49  
50  
51  
52  
53  
54  
55  
56  
57  
58  
59  
60

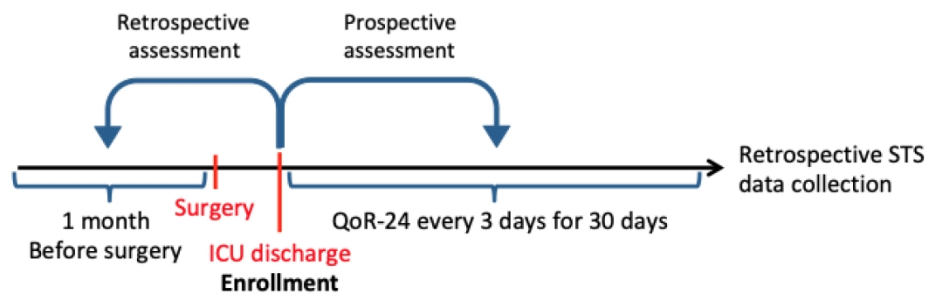

The figure shows the timing of patient enrollment and PROM administration over the clinical course. Baseline function is assessed by retrospectively asking the patient about their state of health during 1 month prior to the operation. 24-item Quality of Recovery questionnaire is administered every 3 days for 30 days following discharge from the intensive care unit.

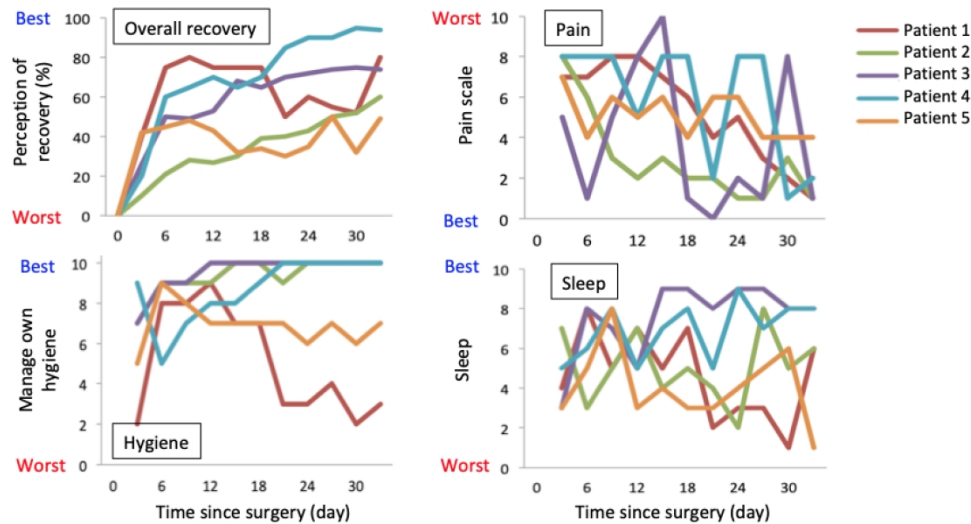

The figures display trajectories of recovery in different domains in 5 patients. Each color corresponds to the same patient. Overall recovery is the patient's perception of overall recovery in 0 to 100% scale. Pain in surgical site is reported in 0 to 10 point scale, with 10 representing the worst pain. Being able to take care of own hygiene is reported in 0 to 10 point scale, with 10 representing complete independence in managing own hygiene. Patient's perception of sleep quality is reported in 0 to 10 point scale, with 10 being the best sleep.

HIC#:

1  
2  
3 **COMPOUND AUTHORIZATION AND CONSENT FOR PARTICIPATION IN A**  
4 **RESEARCH PROJECT**  
5 **200 FR. 4 (2016-2)**  
6 **YALE UNIVERSITY SCHOOL OF MEDICINE – YALE-NEW HAVEN HOSPITAL**  
7  
8  
9

10 **Study Title:** Understanding Recovery After Cardiac Surgery  
11

12 **Principal Investigator: Arnar Geirsson, MD**  
13 Associate Professor of Surgery (Cardiac)  
14 Yale School of Medicine  
15 Best Contact Number: 475-201-8349  
16  
17

18 **Funding Source:** None  
19

20 **What is this study about?**  
21

22  
23 You are invited to take part in a research study to understand how you recover after heart  
24 surgery. We use an app to centralize your healthcare information from multiple sources so it is  
25 easy for you and researchers to understand your health status and how you are doing after the  
26 surgery. You have been asked to take part in this study because you are planned to undergo or  
27 have undergone cardiac surgery at Yale New Haven Hospital (YNHH). If you agree to take part  
28 in this study, you will be asked to answer questionnaire through a mobile application platform  
29 called Hugo. Through Hugo, you will be asked to answer short questionnaires on your  
30 smartphone or email for up to 90 days.  
31  
32

33 This research study will examine the ability of the mobile health application, Hugo, to  
34 quickly and securely obtain healthcare information from multiple sources to monitor your  
35 outcomes after a procedure. Among the advantages of this system are that, with your permission,  
36 we will be able to access your records at multiple health systems. The risks for this study are  
37 similar to the risks associated with traditional research methods: you are sharing your personal  
38 health information with researchers and there is a risk to your privacy. However, researchers will  
39 only be able to view the health data that you sync with the Hugo platform. There will also be  
40 audit logs of who has accessed your data via Hugo and other safeguards that do not exist with  
41 paper and faxed records. Researchers will also access your records within the YNHH electronic  
42 medical record (EMR) system. This access is to allow the researchers to confirm that your data  
43 has fully come into the Hugo, and that there are no major missing data points.  
44  
45  
46

47 In order to decide whether you would like to be a part of this research study you should  
48 know enough about its risks and benefits to make an informed decision. This consent form gives  
49 you detailed information about the study, which a member of the research team will discuss with  
50 you. This discussion should review all aspects of this research, especially the confidentiality  
51 risks of you having personal health information on your mobile device.  
52  
53  
54  
55  
56  
57  
58  
59  
60

## How is this study conducted?

### *Setup process*

The initial set up process will take about 30 minutes in total and entails the following:

1. Using your own mobile device, a research associate (RA) will help you with the registration process for the mobile platform Hugo. Hugo will be downloaded from Google Play Store or Apple app store. Registration for Hugo will ask for basic information including first name, last name, email address, and to choose a password. You will then be prompted to accept standard terms and conditions and a privacy notice for the Hugo platform.
2. You will check your email and click the confirmation link to activate your new Hugo account.
3. The Hugo mobile application will prompt you to link your patient portal accounts by presenting a list of participating health systems. You can select the systems where you have received care and enter your patient portal credentials (all of these are password-protected).
4. You will be asked to agree to share data from Hugo. The medical record data being shared may include Medications, Problems, Allergies, Procedures, Encounters, Lab Results, Diagnoses, Vital Signs, Notes, and possibly other data that becomes available.
5. The questionnaires will be delivered to you via email or text, whichever you prefer.
6. We are asking your permission at the end of this consent form to give the researchers permission to see health information that you sync and share via the Hugo app along with your YNHH medical record.

**Please note:** The investigators of this study will not be watching or evaluating your symptoms as part of this study, including those that you reply to on the questionnaires. If at any point you begin to experience new symptoms or any medical issues arise, **please contact your doctor or call 911 immediately.**

### *Continuous Study Process*

After the initial in office set up is complete you will be asked to answer questionnaires periodically until the study completion. If you have any questions or experience technical issues at any time, please reach out to the study team via email at [makoto.mori@yale.edu](mailto:makoto.mori@yale.edu):

- An RA will follow up in-person with you the day after you are transferred out of the intensive care unit to make sure your accounts and applications are working correctly, and to answer any additional questions you may have.



HIC#:

- Short questionnaires will be sent to your email or text, depending on your preference, initially every 3 days and eventually every 2 weeks up to 90 days following the surgery. This questionnaire should take around 4 minutes on average to complete. The RA may also call you or reach out via email to check in about any technical issues.
- You will receive reminder emails from the Hugo application 1 and 2 days after your questionnaires are sent, reminding you to complete them. These are automated messages and will be sent even if you have completed the surveys. You will also receive reminder messages to use & sync your provided devices.

### **New Information**

You will be informed of anything that happens during the study that may cause you to re-think your decision to continue participation.

### **Risks and Inconveniences**

The risk to patient privacy is that of any computer system that collects personally identifiable information or protected health information. The Hugo application, like many other personal health record applications, is not a covered entity; this means that the HIPAA privacy rule does not apply to this platform. The Hugo platform takes all necessary precautions, including industry-standard encryption, to minimize privacy and security risks to personally identifiable information stored on behalf of study participants. Hugo makes publicly available its Security Statement (<http://hugophr.com/security>), its Privacy Notice (<http://hugophr.com/privacy-notice>), and Terms of Service (<http://hugophr.com/terms-of-service/>). Access to your YNHH medical record will only be within the Epic electronic medical records system; information will not be entered or removed.

You will be asked to volunteer your time to answer questions, and this is considered inconvenience.

There is no extra procedure or medications given for this study, and being on this study does not alter your care from the care you would receive had you not participated in this study.

### **Benefits**

A possible benefit of this study is that you will have easy access to the information contained in your Yale New Haven Health and outside health records that may exist at other participating health systems. Seeing the summary of questionnaire response may also help you and the family to gain awareness and information regarding your health.

You will still be responsible for any costs associated with routine follow-ups or doctor visits, but there will be no additional follow-ups or doctor visits necessary for this study. You are responsible for data charges that may be incurred for utilizing online features of the Hugo when not connected to Wi-Fi.

### **Treatment Alternatives/Alternatives**

If you decide not to participate in this study, you will still have access to your medical records as you would normally. The alternative is to not to participate.

### **Confidentiality and Privacy**

The risk to patient privacy is no different with this study than it is with any other study that securely collects and appropriately stores personally identifiable information or protected health information. Any data transferred as part of the research protocol will be sent via secure and encrypted standard methods. Any identifiable information that is obtained in connection with this study will remain confidential and will be disclosed only with your permission. When the results of the research are published, or discussed in conferences, no information will be included that would reveal your identity, unless your specific consent is obtained.

The information about your health that will be collected in this study includes:

- Electronic medical records from health systems that you import into the Hugo Health, including from Yale New Haven Health system
- Mobile questionnaires that you respond to
- Records about phone calls or emails made as part of this research
- Records about your clinical visits
- Pre-operative, intra-operative and discharge notes within Hugo or the YNHH Electronic Medical Record

Information about you and your health which might identify you may be used by or given to:

1. Representatives from Yale University, the Yale Human Research Protection Program and the Yale Human Investigation Committee (the committee that reviews, approves, and monitors research on human subjects), who are responsible for ensuring research compliance. These individuals are required to keep all information confidential.
2. The Principal Investigator, along with other research staff and collaborators who are assisting with this study
3. Me2Health, the company that owns the mobile application for troubleshooting purposes
4. Health care providers who provide services to you in connection with this study

All health care providers subject to HIPAA (Health Insurance Portability and Accountability Act) are required to protect the privacy of your information. The research staff at the Yale School of Medicine are required to comply with HIPAA and to ensure the confidentiality of your information. Some of the individuals or agencies listed above may not be subject to HIPAA and, therefore, may not be required to provide the same type of confidentiality protection. They could use or disclose your information in ways not mentioned in this form. However, to better protect your health information, agreements are in place with these individuals and/or companies that require that they keep your information confidential. In addition, note that the Hugo is not

HIC#:

1  
2  
3 required to comply with HIPAA but is required to maintain the confidentiality of your  
4 information as described in the privacy notice to be provided when you sign up for Hugo.  
5

6 This authorization to use and disclose your health information collected during your participation  
7 in this study will never expire.  
8  
9

### 10 **Voluntary Participation and Withdrawal**

11  
12 Participating in this study is voluntary and you are free to choose not to take part in this study.  
13 **Declining to participate or withdrawing will involve no penalty or loss of benefits to which**  
14 **you are otherwise entitled** (such as your health care outside the study, the payment for your  
15 health care, and your health care benefits). It will not harm your relationship with your own  
16 doctors or with Yale-New Haven Health or the care that you receive.  
17  
18

19 If you do become a study participant, you are free to stop and withdraw from this study at any  
20 time during its course.  
21

22  
23 To withdraw from the study, you can call a member of the research team to let them know that  
24 you would no longer like to take part. The telephone number to do this is 475-201-8349. You  
25 may also email the intent to makoto.mori@yale.edu.  
26

27 When you withdraw from this study, no new health information identifying you will be gathered  
28 after that date. Information that has already been collected may still be used until the end of the  
29 research study, as necessary to ensure the integrity of the study and/or study oversight.  
30  
31

### 32 **Questions**

33  
34 We have used some technical terms in this form. Please feel free to ask about anything you don't  
35 understand and to consider this research and the consent form carefully – as long as you feel is  
36 necessary – before you make a decision.  
37  
38  
39  
40  
41  
42  
43  
44  
45  
46  
47  
48  
49  
50  
51  
52  
53  
54  
55  
56  
57  
58  
59  
60

1  
2  
3 **Authorization and Permission**  
4

5 I have read (or someone has read to me) this form and have decided to participate in the project  
6 described above. Its general purposes, the particulars of my involvement and possible hazards  
7 and inconveniences have been explained to my satisfaction. My signature also indicates that I  
8 have received a copy of this consent form.  
9

10  
11 By signing this form, I give permission to the researchers to use [and give out] information about  
12 me for the purposes described in this form. By refusing to give permission, I understand that I  
13 will not be able to be in this research.  
14

15  
16  
17 Print Name of Participant: \_\_\_\_\_  
18

19  
20 Signature: \_\_\_\_\_  
21

22  
23  
24 Date: \_\_\_\_\_  
25

26  
27  
28 If after you have signed this form you have any questions about your privacy rights, please  
29 contact the Yale Privacy Officer at 203-432-5919.  
30

31  
32 If you have further questions about this project or if you have a research-related problem, you  
33 may contact the Research Associate, Makoto Mori, at 475-201-8349 or at  
34 makoto.mori@yale.edu. If you would like to talk with someone other than the researchers to  
35 discuss problems, concerns, and questions you may have concerning this research, or to discuss  
36 your rights as a research participant, you may contact the Yale Human Investigation Committee  
37 at 203-785-4688.  
38  
39  
40  
41  
42  
43  
44  
45  
46  
47  
48  
49  
50  
51  
52  
53  
54  
55  
56  
57  
58  
59  
60

## Modification of Quality of Recovery (QoR-24) Questionnaire

\*Answered in visual analogue scale: 0 [none of the time] to 10 [all of the time]

*'During the last 24 hours, I have been...'*

### *Modified:*

1. Able to breathe easily
2. Having normal bowel function
3. Able to enjoy food
4. Speaking normally
5. Able to think clearly
6. Able to remember things
7. Able to make decisions quickly
8. Able to take care of own hygiene
9. Able to write
10. Able to dress easily
11. Having pain in the surgical wound
12. Having nausea
13. Shivering or twitching
14. Feeling dizziness
15. Feeling restless
16. Feeling rested
17. Feeling depressed
18. Feeling lonely
19. Having anxiety
20. Sleeping well
21. Difficulties getting to sleep
22. What time did you fall asleep? What time did you wake up without going back to sleep?
23. How much do you think you have recovered? (0-100%)
24. Open ended question: 'Please describe what you are feeling (good and bad), what bothers you, and what has been helpful to your recovery'

## Hugo recovery interview guide

### Logistics:

- Email or call patient with response rate <50% to set up time or proceed directly with interview
- The interview likely takes 10-15 minutes
- Likely use Zoom to record interview

### Before interview:

- Make clear that the intent is to learn from the interview and no hard feelings about not being able to complete the survey
- Make clear that honest opinion is most helpful for us to improve

### Interview guide:

- What challenges or difficulties did you have in completing surveys?
- Did you know that surveys were emailed/texted to you? (How often do you check your email/texts?)
- What would have helped to engage you better? (better interface, better explanations of the study, why the study is important, other incentives, etc)
- Were there any technical issues with the surveys? (email/text didn't deliver, interface was not friendly, etc)
- Would reminder emails have been helpful?
- Were there too many questions?
- Did any questions feel irrelevant to you?

Supplementary Table 1: Candidate instruments to measure postoperative recovery

| Tool                                           | Assessed interval                              | Population                      | Number of questions | Published Year | Self-administer? | Surgery type                                          | Derivation size |
|------------------------------------------------|------------------------------------------------|---------------------------------|---------------------|----------------|------------------|-------------------------------------------------------|-----------------|
| Postdischarge Surgical Recovery (PSR)          | Day 4                                          | Ambulatory                      | 18                  | 2000           | Yes              | Laparoscopic cholecystectomy, hernia repair           | 163             |
| Quality of Recovery (QoR)                      | 24 h                                           | Inpatient and ambulatory, adult | 24                  | 2000           | Yes              | Surgery with general anesthesia                       | 160             |
| Surgical Recovery Index (SRI)                  | Day 7, 14, 21 and 28                           | Inpatient                       | 24                  | 2004           | Yes              | Laparoscopic and open surgery (not specified further) | 149             |
| Functional Recovery Index (FRI)                | Baseline, day 1, 3, 5 and 7                    | Ambulatory, adult               | 14                  | 2009           | Yes              | Various ambulatory                                    | 324             |
| Postoperative Quality of Recovery Score (PQRS) | Baseline, 15 and 45 min, day 1 and 3, 3 months | Inpatient, pediatrics + adults  | 18                  | 2010           | No               | Elective surgery with general anesthesia              | 701             |
| Surgical Recovery Scale (SRS)                  | Baseline, day 3, 7, 30 and 60                  | Inpatient, adult                | 13                  | 2011           | Yes              | Elective colonic resection                            | 150             |

Supplementary Table 2: Validity tested and domains assessed in instruments to measure postoperative recovery

| Tool                                           | Validity assessed                                              | Cognitive | Nociceptive/pain | Emotive | Sleep | Activity of daily living | Physiologic | Reasons not chosen    |
|------------------------------------------------|----------------------------------------------------------------|-----------|------------------|---------|-------|--------------------------|-------------|-----------------------|
| Postdischarge Surgical Recovery (PSR)          | Construct, convergent validity                                 |           |                  | Y       |       | Y                        |             | Low number of domains |
| Quality of Recovery (QoR)                      | Convergent, construct, test-retest reliability, responsiveness | Y         |                  | Y       | Y     | Y                        | Y           | -                     |
| Surgical Recovery Index (SRI)                  | Convergent validity                                            |           | Y                |         |       | Y                        |             | Low number of domains |
| Functional Recovery Index (FRI)                | Discriminant validity                                          |           | Y                |         |       | Y                        |             | Low number of domains |
| Postoperative Quality of Recovery Score (PQRS) | Face validity                                                  | Y         | Y                | Y       |       | Y                        | Y           | Requires administer   |
| Surgical Recovery Scale (SRS)                  | None                                                           |           |                  | Y       |       | Y                        |             | Low number of domains |
