# Supplementary material for: Protocol for project recovery after cardiac surgery: a single-center cohort study leveraging digital platform to characterise longitudinal patient-reported postoperative recovery patterns
Source: PubMed Central journal article supplement — BMJ Open. 2020 Sep 1;10(9):e036959. doi: 10.1136/bmjopen-2020-036959 (PMC7467526; doi:10.1136/bmjopen-2020-036959), 2020-09-01
Supplement: bmjopen-2020-036959supp002.pdf [file bmjopen-2020-036959supp002.pdf]

Supplementary Table 1: Candidate instruments to measure postoperative recovery

| <b>Tool</b>                                    | <b>Assessed interval</b>                       | <b>Population</b>               | <b>Number of questions</b> | <b>Published Year</b> | <b>Self-administer?</b> | <b>Surgery type</b>                                   | <b>Derivation size</b> |
|------------------------------------------------|------------------------------------------------|---------------------------------|----------------------------|-----------------------|-------------------------|-------------------------------------------------------|------------------------|
| Postdischarge Surgical Recovery (PSR)          | Day 4                                          | Ambulatory                      | 18                         | 2000                  | Yes                     | Laparoscopic cholecystectomy, hernia repair           | 163                    |
| Quality of Recovery (QoR)                      | 24 h                                           | Inpatient and ambulatory, adult | 24                         | 2000                  | Yes                     | Surgery with general anesthesia                       | 160                    |
| Surgical Recovery Index (SRI)                  | Day 7, 14, 21 and 28                           | Inpatient                       | 24                         | 2004                  | Yes                     | Laparoscopic and open surgery (not specified further) | 149                    |
| Functional Recovery Index (FRI)                | Baseline, day 1, 3, 5 and 7                    | Ambulatory, adult               | 14                         | 2009                  | Yes                     | Various ambulatory                                    | 324                    |
| Postoperative Quality of Recovery Score (PQRS) | Baseline, 15 and 45 min, day 1 and 3, 3 months | Inpatient, pediatrics + adults  | 18                         | 2010                  | No                      | Elective surgery with general anesthesia              | 701                    |
| Surgical Recovery Scale (SRS)                  | Baseline, day 3, 7, 30 and 60                  | Inpatient, adult                | 13                         | 2011                  | Yes                     | Elective colonic resection                            | 150                    |
